# Population mortality before and during armed conflict in Yemen: geospatial and statistical analysis of cemetery data

Francesco Checchi<sup>1\*</sup>, Emilie Koum Besson<sup>1</sup>, Ola Ali<sup>1</sup>, Mervat Alhaffar<sup>1</sup>, Naji Saeed<sup>4</sup>, Yolanda Vasquez<sup>2</sup>,  
Terri Freemantle<sup>2</sup>, Momin Ashraf<sup>2</sup>, Chris Reeve<sup>2</sup>, Colin Scott<sup>3</sup>, Timothy Lingard<sup>3</sup>, Andy Norris<sup>2</sup>

1 Department of Infectious Disease Epidemiology

Faculty of Epidemiology and Population Health

London School of Hygiene and Tropical Medicine, London, UK

Keppel St, London WC1E 7HT

2 Satellite Applications Catapult

Electron Building, Fermi Ave, Didcot OX11 0QR

3 1715 Labs

Suite 9, 46 Woodstock Rd, Woodstock, Oxford OX2 6HT

4 independent consultant

\* Corresponding author: [francesco.checchi@lshtm.ac.uk](mailto:francesco.checchi@lshtm.ac.uk)

**NOTE: This preprint reports new research that has not been certified by peer review and should not be used to guide clinical practice.**

## 28 Abstract

29 Since 2014, Yemen is affected by crisis conditions due to armed conflict. Evidence on the impact of this  
30 large-scale crisis on mortality is lacking. We analysed archive very high-resolution satellite imagery from  
31 a sample of Yemeni subdistricts to quantify changes in burial incidence attributable to the crisis.

32 We identified possible cemeteries through remote and ground sources in 24 sampled subdistricts. After  
33 initial triage and extensive steps to improve the interpretability of archive imagery spanning the period  
34 2011 to 2021, a pool of crowd workers, supervised by expert analysts and aided by an automated  
35 algorithm, annotated surface area and grave counts in sequential images from a set of analysis-eligible  
36 cemeteries. We complemented these longitudinal observations with data on different predictors including  
37 three crisis proxies (incidence of insecurity events, price of staple cereal, internal displacement), and  
38 fitted statistical models to compare predicted burials under observed and assumed counterfactual (no  
39 crisis) conditions.

40 We identified 561 potential cemeteries within 24 sampled subdistricts, but excluded most due to inability  
41 to geolocate them or see the cemetery and/or graves in available imagery, yielding an effective sample  
42 of 110 image observations across 35 cemeteries in 10 subdistricts. Burial rate generally decreased  
43 between 2014-2018 and rose sharply thereafter. Alternative regression models suggested that most  
44 cemeteries would have experienced lower burial rate under non-crisis conditions, with a crisis to non-  
45 crisis ratio of about two overall. The incidence of insecurity events appeared positively associated with  
46 burial rate.

47 This unprecedented-scale geospatial analysis of cemeteries suggests an increase in burial rates  
48 attributable to crisis conditions in a non-representative, disproportionately urban sample of Yemen. The  
49 study identifies key challenges of such an analysis. We discuss possible methodological ways forward to  
50 further explore the feasibility and validity of this option for mortality estimation in settings with insufficient  
51 vital events registration and limited ground access.

## 52 Introduction

53 Since late 2014, Yemen has been affected by armed conflict resulting in worsened food security, internal  
54 displacement and disruption of public services [1]. The country has also been separated into areas  
55 controlled by opposing authorities. The crisis in Yemen has been described as the world's largest, but  
56 the extent to which it has affected population mortality across the country remains unclear, depriving  
57 response actors and other stakeholders of critical evidence for benchmarking the war's impacts and the  
58 adequacy of response efforts [2]. While a credible estimate of people killed by war injuries (about  
59 110,000 as of end 2022 [3]) has been established based on media and civil society report monitoring,  
60 the death toll indirectly attributable to the conflict could be substantial, as suggested by the occurrence  
61 over the past few years of repeated phases of food insecurity [4, 5], reduced health service functionality  
62 [6, 7], forced displacement [8] and large-scale epidemics [9]. Against this backdrop, the COVID-19  
63 pandemic would plausibly have resulted in a further mortality increase [10–12].

64 In Yemen, as in many low- and middle-income countries [13, 14], vital events registration is not robust,  
65 necessitating collection of alternative mortality data. In 2019, a United Nations report [15] based on  
66 scenario modelling projected that 166,000 conflict deaths and 316,000 deaths indirectly attributable to  
67 the crisis would occur by 2022, based on a median scenario. In nine purposively selected communities  
68 within Aden and Ta'iz governorates, we combined lists generated by key informants with capture-  
69 recapture statistics to estimate adult death rates, suggesting a pattern of considerably elevated mortality  
70 during the war period, compared to baseline [16]. However, this study was limited by underreporting of  
71 child deaths and the purposive nature of the sample. After the first phase of the pandemic, we also  
72 analysed sequential very high-resolution (VHR) satellite images of cemeteries in the city of Aden to  
73 estimate pandemic-attributable mortality, likely the first instance of this method's use [17]. Here, we  
74 expand methods and scale of this geospatial data-driven approach to explore how the crisis has affected  
75 mortality patterns elsewhere in Yemen.

76

## 77 Methods

### 78 Study population and period

79 Our study period was January 2011 to December 2021 (11y). The current armed conflict escalated in  
80 June 2014 (start of the 'crisis period' in our analysis), while the first confirmed SARS-CoV-2 infection was  
81 reported on 10 April 2020, with limited testing data suggesting two distinct waves (May to September  
82 2020 and March to May 2021) [18]: we thus consider April 2020 and beyond as the 'pandemic period'.

83 Yemen is divided into 22 governorates, 335 districts and 2149 subdistricts. The latter had a mean  
84 population of 13,000 based on United Nations projections available in early 2020. We originally intended  
85 to estimate mortality based on a representative sample of Yemeni person-time: we thus selected 24  
86 subdistricts through systematic random sampling based on probability proportional to population size

87 along the sampling frame of all sub-districts, sorted by (i) cumulative rate of war injury deaths as reported  
88 by ACLED [19] (<https://acleddata.com/data-export-tool/>) and (ii) population density (as a proxy of  
89 urbanisation). We sought to collect longitudinal data on incident burials within each cemetery in each  
90 sampled subdistrict. Assuming all decedents were buried in recognisable cemeteries (i.e. burial rate =  
91 death rate), this sample size should have provided 80% power to detect an increase in the crude (all-  
92 age, all-cause) death rate of  $\geq 10\%$  from the UN-projected baseline for 2010-2015 (6 per 1000 per year),  
93 with 95% significance, design effect of 3.5 and 20% attrition. As the study progressed, however, it  
94 became clear that resource and imagery limitations precluded analysis of all cemeteries, constraining  
95 analysis to a smaller sample within which robust data could be generated (see below).

96

## 97 Data sources and collection

### 98 *Lists and locations of potential cemeteries*

99 Before undertaking cemetery identification in each of the sampled subdistricts, we searched the grey and  
100 peer-reviewed literature non-systematically and interacted with a network of Yemeni researchers and  
101 civil society members formed during a previous research project [16] to explore burial customs and how  
102 these may have changed during the war and pandemic. These information sources indicated that the  
103 vast majority of Yemenis are buried in recognised cemeteries.

104 We composed a longlist of potential cemeteries by (i) asking our network to liaise with contacts in each  
105 subdistrict; (ii) visually inspecting freely available VHR imagery and annotation layers within the  
106 OpenStreetMap (<https://www.openstreetmap.org/>), Wikimapia (<https://wikimapia.org>), Google Earth  
107 (<https://earth.google.com/web/>) and Google Maps (<https://www.google.com/maps>) applications, guided  
108 by pilot work in Aden [17] and Mogadishu, Somalia [20]; (iii) leveraging a professional network of Yemeni  
109 geographers, who were able to either personally geolocate cemeteries or supply information (e.g. village,  
110 nearby landmarks) to aid remote geolocation. UK- and Yemen-based geographers worked together to  
111 resolve missing coordinates of individual cemeteries, identify duplicates across the three above sources  
112 and exclude cemeteries that were not within the subdistrict boundaries or (rarely) whose surface area  
113 mostly fell outside the subdistrict.

114

### 115 *Satellite imagery*

116 At the time of this study, only one satellite imagery provider (Maxar) offered imagery with the resolution  
117 (< 50 cm) required for burial identification. We purchased from Maxar all commercially available, archive  
118 VHR images that covered successfully geolocated candidate cemeteries and were acquired during the  
119 analysis period with a spatial resolution between ~31cm to <50 cm per pixel. Images were supplied by  
120 SecureWatch (<https://www.maxar.com/products/securewatch>) as Ortho Natural Colour images that have  
121 been, pre-processed, pan-sharpened and corrected for illumination and geometric distortion.

122

### 123 *Predictor data*

124 We used multivariate predictive models to estimate the evolution of burial rate in each cemetery, and  
125 generate counterfactual burial rate levels in the absence of a crisis (see Statistical Analysis). Some  
126 predictor variables for these models came from the geospatial analysis itself, and included image-level  
127 (whether infilling had occurred since the previous image; image quality score; see Geospatial Analysis)  
128 and cemetery-level (under northern or southern government control; urban versus rural setting)  
129 characteristics. Externally sourced predictors included (i) a geospatial dataset of Yemen's road network  
130 [21], which we transformed into road density (Km per Km<sup>2</sup> area); (ii) a crowd-sourced dataset of health  
131 facilities [22], which we combined with reconstructed population denominators [8] to estimate health  
132 facility density per 100,000 people; (iii) governorate-level estimates of under 5y mortality per 1000 live  
133 births as per the 2013 Demographic and Health Survey [23], as a proxy of baseline burial rate; (iv)  
134 georeferenced data on insecurity events and fatalities collected by the Armed Conflict Location and  
135 Event Data Project (ACLED) [19] since 2015 through intensive media monitoring and civil society reports  
136 [3]; (v) the proportion of internally displaced persons (IDPs) within the subdistrict, per month, estimated  
137 separately [8]; (vi) exposure to COVID-19, expressed as the proportion of the inter-image period within  
138 each cemetery that fell within the pandemic period; and (vii) the price of wheat, a key staple and thus  
139 proxy of food insecurity, as collected monthly in four urban markets (Aden, Al Hudaydah, Sana'a,  
140 Sa'ada) by the World Food Programme [24] (we paired each subdistrict with one of these markets based  
141 on proximity and expressed price per 2011 USD adjusted for inflation rates). For time-varying predictors  
142 (insecurity events, wheat price), we calculated the mean value during each inter-image period.

143

### 144 *Geospatial analysis*

#### 145 *Image inspection and initial shortlisting of cemeteries*

146 Initial inspection was conducted for all cemeteries by no fewer than two experienced geospatial analysts.  
147 Potential cemeteries for which boundaries and/or graves were not visible were excluded. Remaining  
148 cemeteries were further shortlisted based on expected ease of demarcating graves and cemetery area  
149 from surrounding terrain given soil type (agricultural, rocky, sand, vegetation), vegetation cover and  
150 available imagery. Only cemeteries for which, according to the analysts, there was a realistic chance of  
151 obtaining data after image enhancement (see below) were taken forward to the next stage of analysis.

152

#### 153 *Enhancement and quality scoring of images for shortlisted cemeteries*

154 Given available resources, we sought to include between two (below which burial rate was  
155 unobservable) and three images per cemetery, with no more than one image per analysis subperiod  
156 (pre-crisis, crisis and pandemic). To select the best images, we firstly enhanced each available image

157 using the `scikit-image` Python package, in three sequential steps: (i) stripping any alpha channels  
158 from the image, leaving only the UInt-8 RGB (red, green and blue) channels (if an image had only one  
159 channel, we converted it to a greyscale RGB); (ii) Contrast Limited Adaptive Histogram Equalization [25,  
160 26] on the image, with a clip limit of 3% and a kernel size of 1/8th of the image; (iii) merging this contrast-  
161 adjusted image with the source image, with an alpha of 30% (i.e. 30% coming from the adjusted image,  
162 70% from the source); and (iv) performing unsharp masking [27] to sharpen the image without unduly  
163 exacerbating noise, with a radius of 10 pixels, amplification (amount) of 0.5 and treating each colour  
164 channel independently. The net result of these transformations is exemplified in S1 Appendix (Fig S1).  
165 Next, we employed crowd sourcing to score from 0 (i.e. perfect visibility) to 3 (unusably poor) each  
166 enhanced image  $i$  according to two dimensions of quality: (i) 'area clarity' or  $q_{a,i}$  (ability to discern the  
167 cemetery's boundaries and any rows or blocks of graves) and (ii) 'grave clarity' or  $q_{g,i}$  (ability to identify  
168 individual graves): example imagery is shown in S1 Appendix (Fig S2, Fig S3). We relied on a crowd  
169 worker pool (primarily North American [28] and remunerated based on United States living wage, but  
170 with no geographical or educational attainment restriction other than English language comprehension)  
171 provided by Amazon's Mechanical Turk platform, which has previously supported geospatial projects.  
172 Altogether, 1105 crowd workers contributed analysis, though we omitted instances of inadequate output.  
173 Images submitted to the crowd worker pool were accompanied by extensive help text and examples and  
174 seeded with hidden assessments to remove workers that might have been misunderstanding or gaming  
175 the task (further detail available on request). As mean  $q_{a,i}$  and  $q_{g,i}$  (computed from > 5000 individual  
176 scores of 932 images) were highly correlated (S1 Appendix, Fig S4), we combined both into a single  
177 quality score  $q_i = \sqrt{q_{a,i}^2 + q_{g,i}^2}$ . Notably, image date was not a correlate of quality (data not shown).

178

### 179 *Final selection of images for analysis*

180 For each cemetery and subperiod, we focussed on the two images with best (lowest)  $q_i$  and excluded  
181 any whose quality was so poor that we could not identify and place point markers on graves, plus any  
182 sets of images for a given cemetery across which we could not consistently identify at least three static,  
183 ground-level features (e.g. a tree) to support tie-point orthorectification (see below). After applying these  
184 further criteria, cemeteries that had < 2 analysable images over the entire analysis period were  
185 additionally excluded. One of the cemeteries in Aden governorate had been analysed in depth as part of  
186 the previous study [17]: as geospatial methods were compatible, we included data from this cemetery.

187

### 188 *Surface area estimation for included images*

189 To achieve orthorectification of images from a given cemetery (i.e. comparable geometries despite  
190 varying satellite angles), we employed the same crowd worker pool to place at least four and up to six  
191 tie-points at consistently identifiable features (e.g. graves, buildings, trees) that appeared in each image:

192 we then used the `scikit-image` package to fit affine transformations to these tie-points; these  
193 transformations generally resulted in negligible (a few pixels) errors on cross-validation. Three tie-points  
194 would have been sufficient for the affine transformation used here, but extra tie-points allowed for a  
195 measure of error and to help identify where transformations were more likely to fail.

196 Within each cemetery, and starting with the highest-quality image, we then relied on a subset of highly  
197 performing crowd workers to annotate the vertices of the cemetery's borders: the resulting polygon was  
198 used as a starting basis to annotate the previous and next images in the cemetery's timeline, and so  
199 forth until a surface area polygon was drawn for all images (S1 Appendix, Fig S5, Fig S6). Lastly, we  
200 converted polygons into  $m^2$  by translating each to the orthorectified frame of the oldest image from each  
201 cemetery, using this image's affine transformation to convert to EPSG:4326 coordinates, and then to the  
202 National Snow and Ice Data Center (NSIDC) EASE-Grid 2.0 North coordinate system (EPSG:6931,  
203 <https://epsg.io/6931> [29]).

204 Some cemeteries were particularly sparse, with graves dotted across the entire area (S1 Appendix, Fig  
205 S7). In this instance, a polygon was placed around the exterior boundary of the site, but without  
206 computing surface area.

207

#### 208 *Grave enumeration for included images*

209 We attempted to help crowd workers in this task by automatically identifying and annotating likely graves  
210 through an algorithm optimised through manual inspection. The algorithm combined edge detection and  
211 peak identification techniques and relied on hyperparameters that were only weakly tailored to each  
212 individual cemetery, so as to make it applicable across all sites. More information on the algorithm's  
213 development is available from the authors. The algorithm was tuned to prefer false negatives to false  
214 positives, as analysts found it easier to add rather than remove grave markers; despite this, it  
215 occasionally resulted in moderate sensitivity *and* specificity, as exemplified in S1 Appendix, Fig S9. The  
216 algorithm was not used for sparse cemeteries (see above).

217 After automatic annotation, we divided images into small tiles projected to contain no more than  $\approx 100$   
218 graves in the densest of sites, assuming a minimum surface area per grave of  $1.4m^2$ . We then allocated  
219 tiles to crowd workers and asked them to revise and improve automated annotation by manually moving,  
220 adding or deleting algorithm-generated markers; workers also had the option to start from a blank slate  
221 by removing all automated markers, though most chose to retain and amend them. Here too, we used  
222 hidden assessments and extensive validation of crowd worker output by expert analysts to filter out  
223 unacceptable work and reduce the annotator pool to a trusted team. We used agglomerative clustering  
224 in `scikit-learn` to merge different annotators' grave markers by assuming that markers up to within 7  
225 pixels ( $\sim 3.5m$ ) of each other could identify the same grave.

226 Lastly, so as to mitigate the problem of graves disappearing or becoming less visible over time (see  
227 below), we mapped graves forwards in time from the oldest to the most recent image, such that any

228 graves missed in more recent images would be identified from older ones. Because orthorectification  
 229 does not yield perfectly overlapping images, we resolved the position of each grave over successive  
 230 images by minimising the sum of pixel distances from every grave in an older image to every grave  
 231 within the same 10-pixel radius in the more recent image (this was done in Python through the  
 232 `scipy.optimize.linear_sum_assignment` function), manually checking that output was  
 233 acceptable. The end result is exemplified in Fig 1.

234

235 [FIG 1 HERE]

236 Fig 1. Example of a cemetery at three different time points: graves (coloured in blue) from the earliest time  
 237 point are carried over and supplemented by newer graves from the next time point (coloured in orange) and  
 238 the latest time point (in green). Over time, walkways separating different cemetery blocks are filled in with  
 239 graves, presumably due to space running out. Satellite image © 2021 Maxar Technologies.

240

### 241 *Issues encountered during geospatial analysis*

242 The above steps ran up against different recurring issues with the potential to introduce random error or  
 243 bias into the analysis: these are listed in Table 1, along with data management decisions taken to  
 244 address each.

245

246 Table 1. Issues encountered during geospatial analysis, and corresponding data management decisions.

| Issue                                                                                                                                                                                                                                                     | Potential effect                                                                                                                                                                                                                   | Decision                                                                                                                                                                                              |
|-----------------------------------------------------------------------------------------------------------------------------------------------------------------------------------------------------------------------------------------------------------|------------------------------------------------------------------------------------------------------------------------------------------------------------------------------------------------------------------------------------|-------------------------------------------------------------------------------------------------------------------------------------------------------------------------------------------------------|
| <b>1. Higher quality of recent images reveals previously undetected graves.</b> For some cemeteries (particularly urban), increased image fidelity over time allowed identification of graves where previously not enough information had been available. | <b>Overestimation of burial rate</b> due to an artefactual increase in grave counts over time in cemetery sections already containing graves, an increase partly or fully attributable to improved signal, rather than infilling†. | Ignore grave count in all but the highest-quality image for the cemetery. Impute these missing grave counts from surface area, where possible (see Statistical Analysis).                             |
| <b>2. Serious degradation of image quality over time.</b> This made it hard to measure surface area changes, detect new graves or even perform orthorectification of older images.                                                                        | <b>Underestimation of burial rate,</b> or at least potential for high inaccuracy.                                                                                                                                                  | Omit observations from these images from analysis.                                                                                                                                                    |
| <b>3. Vegetation growth</b> covers more recent images, partly impeding identification of new graves or surface area expansion.                                                                                                                            | <b>Underestimation of burial rate</b> due to some sections of the cemetery becoming invisible.                                                                                                                                     | Case-by-case inspection of images in question: treat observations from these images as missing if it is clear that infilling† or area expansion are occurring in nonvisible sections of the cemetery. |
| <b>4. Sections of cemeteries with very different grave sizes,</b> possibly constituting separate areas for adults and children / infants. Smaller graves may be too small to annotate.                                                                    | <b>Minor data loss.</b> Grave counts could not be done for one cemetery. Other instances of this issue did not impede grave annotation.                                                                                            | Omit all observations from this single cemetery.                                                                                                                                                      |
| <b>5. Poor tie-point correction,</b> leading to inaccuracy in orthorectification (i.e. successive images aligning imperfectly) due to bad choice of tie-points or underlying topography.                                                                  | <b>Negligible</b> under- or overestimation of burial rate. This issue was largely mitigated through re-analysis by expert analysts.                                                                                                | Ignore issue.                                                                                                                                                                                         |



| Issue                                                                                                                                                                 | Potential effect                                                                    | Decision                                                                                                    |
|-----------------------------------------------------------------------------------------------------------------------------------------------------------------------|-------------------------------------------------------------------------------------|-------------------------------------------------------------------------------------------------------------|
| <b>6. No change in surface area or grave counts is seen over time,</b> suggesting the cemetery may have been closed to new burials during the entire analysis period. | <b>Uninformative observations.</b> Data cannot be used to estimate the burial rate. | Omit cemetery from analysis (i.e. retain only cemeteries that were ever active during the analysis period). |

247 † We use the term 'infilling' to denote the frequently encountered practice of digging new graves within cemetery sections  
 248 Potential cemeteries for which boundaries that are already in use, e.g. by using walkways in between graves or any other  
 249 empty space.  
 250

## 251 Statistical analysis

252 Datasets and R scripts used for statistical analysis are available on  
 253 [https://github.com/francescohecchi/yem\\_burials\\_satellite\\_imagery](https://github.com/francescohecchi/yem_burials_satellite_imagery). Our original study design was to  
 254 infer countrywide mortality directly based on the sample of subdistricts. However, across subdistricts we  
 255 were able to generate data for only a minority of cemeteries (see Results), restricting us to an  
 256 exploration of burial patterns within this probably unrepresentative sample of remaining cemeteries.

257 First, we imputed missing grave count values (Table 1) by training a predictive generalised linear mixed  
 258 model (GLMM) on longitudinal cemetery observations with complete surface area and grave count (Sq  
 259 Appendix, Fig S12). The model estimated new graves since the previous image as a function of the  
 260 natural log of new surface area with starting grave count as an offset, cemetery as a random effect and a  
 261 negative binomial distributional assumption. We validated the model for prediction using leave-one-out  
 262 cross-validation (S1 Appendix, Fig S13). For more detail, see Koum Besson et al. [17].

263 Next, we sought to model the number of new graves between each image observation, so as to explore  
 264 either the association of burial with factors considered proxies of crisis exposure (incidence of insecurity  
 265 events; price of wheat; proportion of IDPs in the population), adjusted for possible confounders; or the  
 266 ratio of predicted burials under observed conditions versus under assumed counterfactual values of the  
 267 crisis-proxy predictors. We assumed that counterfactual (i.e. no crisis) conditions would have consisted  
 268 of zero insecurity events, zero displacement and the district-specific mean wheat price before the crisis  
 269 period (March 2009, start of the price time series, to May 2014). We divided predictions under observed  
 270 and counterfactual conditions to compute a burial rate ratio for each cemetery, as well as a crude overall  
 271 rate ratio by summing predictions across all cemeteries.

272 We initially fit generalised linear or additive mixed models (with cemetery as random effect) to the counts  
 273 of incident graves: both, however, featured extreme coefficient instability due to multi-collinearity, even  
 274 after centring and standardising all continuous predictors. This restricted us to approaches that do cope  
 275 with multicollinear data, but for which existing, well-documented statistical methods and packages have  
 276 limited applicability (some do not account for longitudinal/grouped observations; others do not model  
 277 count data). Specifically, we fitted the following alternatives: (i) a random forest (*ranger* package [30])  
 278 regression of the logged continuous burial rate (graves per day) with 1000 trees, minimum node size of 2  
 279 and weights for each observation corresponding to the proportion of all new graves in the sample  
 280 accounted for by the cemetery to which the observation belonged; (ii) an elastic net generalised linear

281 Poisson model (`glmnet` package [31]) of the counts of new graves, offset by the duration of each inter-  
 282 observation period and weighted as above; this model, a compromise between ridge and LASSO  
 283 regression, enables selection of a set of predictors even when multicollinearity is high, though it does not  
 284 produce easily interpretable coefficients; and (iii) a Bayesian kernel regression machine (BKMR) model  
 285 (`bkmr` [32] and `bkmrhat` packages) of the logged continuous burial rate, which treats exposures as an  
 286 inherently correlated mixture of factors with a potentially hierarchical structure, while selecting out single  
 287 exposures that do not contribute significantly to the outcome [33]. BKMR allows for grouped  
 288 observations, adjustment variables and non-linear exposure-outcome relationships.

289

## 290 Ethics statement

291 The study was approved by the Ethics Committee of the London School of Hygiene and Tropical  
 292 Medicine (Reference: 22080). No data on live human participants were collected, and as such no  
 293 consent was sought. All data has been previously collected for non-research purposes and the resolution  
 294 of satellite imagery did not enable identification of people or other unique identifiers.

295

## 296 Results

### 297 Composition of the sample

#### 298 Target sample

299 Altogether, the 24 sampled subdistricts contained an estimated 1,956,000 people (about 6% of Yemen's  
 300 total population of 30.9M as of September 2021; Table 2, Fig 3).

301

302 Table 2. Characteristics of sampled subdistricts.

| Governorate | District        | Subdistrict      | Population (Jun 2014) | Population (Sep 2021)† | Number of IDPs (Sep 2021)† | Surface area (m <sup>2</sup> ) |
|-------------|-----------------|------------------|-----------------------|------------------------|----------------------------|--------------------------------|
| Aden        | Al Mansurah     | Al Mansurah      | 157,800               | 178,700                | 1,200                      | 35,774,215                     |
|             | Al Mu'alla      | Al Mu'alla       | 41,400                | 45,800                 | 1,100                      | 4,123,196                      |
| Al Bayda    | Mukayras        | Mukayras         | 54,000                | 61,400                 | 1,500                      | 771,123,936                    |
| Al Hodeidah | Al Khukhah      | Al Omayysi       | 17,400                | 23,400                 | 1,800                      | 297,708,264                    |
|             | Al Marawi'ah    | Al Marawi'ah     | 66,900                | 93,700                 | 5,500                      | 151,186,701                    |
|             | Zabid           | Mahal Ash Shaykh | 2,700                 | 3,500                  | 200                        | 5,809,389                      |
| Al Mahwit   | Ar Rujum        | Bani Al Badi     | 12,200                | 14,300                 | 100                        | 103,723,219                    |
| Amran       | Thula           | Al Khamis        | 14,000                | 10,100                 | 200                        | 13,698,328                     |
| Dhamar      | Al Manar        | Bani Salamah     | 8,000                 | 10,600                 | 200                        | 30,178,410                     |
| Hadramawt   | Al Qatn         | Al Qatn          | 70,500                | 85,800                 | 400                        | 1,279,715,294                  |
| Hajjah      | Ash shaghadirah | Al Hawasilah     | 3,100                 | 3,000                  | 100                        | 5,475,826                      |
| Ibb         | Al Makhadir     | Ash Sharaf       | 12,700                | 13,800                 | 100                        | 21,185,480                     |
|             | Ba'dan          | Al Manar         | 17,800                | 20,400                 | 300                        | 31,731,758                     |
|             | Hazm Al Odayn   | Al Ahkum         | 13,600                | 17,300                 | 200                        | 84,964,277                     |
|             | Ibb             | Maytam           | 33,400                | 35,900                 | 200                        | 30,268,097                     |
| Lahj        | Al Had          | Al Had           | 75,300                | 91,700                 | 1,600                      | 309,245,868                    |
| Raymah      | As Salafiyah    | Al Aslaf         | 8,700                 | 10,800                 | 500                        | 40,213,839                     |
| Sa'dah      | Sa'dah          | Al Abdin Gharaz  | 26,200                | 35,400                 | 1,500                      | 20,226,793                     |

|             |            |                |         |         |        |             |
|-------------|------------|----------------|---------|---------|--------|-------------|
| Sana'a      | Nihm       | Eyal Ghafir    | 15,400  | 15,000  | 200    | 579,369,715 |
| Sana'a City | As Sab'in  | As Sab'in      | 449,700 | 510,200 | 18,900 | 51,207,346  |
|             | As Safiyah | As Safiyah     | 155,500 | 180,900 | 7,500  | 7,599,893   |
|             | Ma'in      | Ma'in          | 370,300 | 425,200 | 27,300 | 28,467,744  |
| Ta'iz       | Al Misrakh | Al Aqrud       | 52,700  | 50,400  | 2,000  | 40,955,810  |
|             | As Silw    | Sa'lat Quradah | 14,900  | 18,800  | 800    | 7,881,161   |

† Latest time point for which reconstructed population and number of internally displaced persons (IDPs) were available [8].

303  
304

### 305 *Sample attrition*

306 The process of identifying possible cemeteries could not be completed in four subdistricts (Table 3). Out  
307 of 800 cemeteries initially listed, 239 were excluded for reasons not entailing potential bias (Fig 2). A  
308 further 467 were excluded at initial inspection as the cemetery was simply not locatable or visible, or  
309 appeared hard or impossible to analyse given available image quality even if some graves were visible.  
310 Notably, 205 cemeteries reviewed at this stage did have some visible graves, representing a minimum  
311 plausible denominator for the true number of cemeteries within the subdistricts. There were further data  
312 losses during geospatial analysis, largely because several cemeteries had < 2 images with robust data.  
313 Only 35 cemeteries in 10/24 subdistricts were ultimately included in statistical analysis, namely 17.1% of  
314 those with any visible graves (Fig 2, Table 3, Fig 3). Further detail is provided in S1 Appendix, Table S1.

315

316 **Table 3. Composition of the final sample of cemeteries, by subdistrict.**

| Subdistrict      | Cemetery identification |                             | Triage                      |                                     |                                      | Final inclusion                             |                                                                  |                                                                    |
|------------------|-------------------------|-----------------------------|-----------------------------|-------------------------------------|--------------------------------------|---------------------------------------------|------------------------------------------------------------------|--------------------------------------------------------------------|
|                  | Search completed        | Number of cemeteries listed | Number eligible so far (N1) | Number with any visible graves (N2) | Number carried into imagery analysis | Number included in statistical analysis (n) | Percent included out of all shortlisted in initial triage (n/N1) | Percent included out of all shortlisted with visible graves (n/N2) |
| Al Abdin Gharaz  | yes                     | 16                          | 14                          | 11                                  | 5                                    | 3                                           | 21.4%                                                            | 27.3%                                                              |
| Al Ahkum         | yes                     | 18                          | 13                          | 0                                   | 0                                    | 0                                           | 0.0%                                                             | n/a                                                                |
| Al Aqrud         | yes                     | 66                          | 58                          | 32                                  | 16                                   | 1                                           | 1.7%                                                             | 3.1%                                                               |
| Al Aslaf         | no†                     | 54                          | 38                          | 7                                   | 0                                    | 0                                           | 0.0%                                                             | 0.0%                                                               |
| Al Had           | yes                     | 98                          | 87                          | 20                                  | 0                                    | 0                                           | 0.0%                                                             | 0.0%                                                               |
| Al Hawasilah     | no‡                     | 1                           | 1                           | 0                                   | 0                                    | 0                                           | 0.0%                                                             | n/a                                                                |
| Al Khamis        | yes                     | 9                           | 9                           | 7                                   | 2                                    | 0                                           | 0.0%                                                             | 0.0%                                                               |
| Al Manar         | yes                     | 41                          | 35                          | 28                                  | 13                                   | 6                                           | 17.1%                                                            | 21.4%                                                              |
| Al Mansurah      | yes                     | 11                          | 6                           | 4                                   | 4                                    | 2                                           | 33.3%                                                            | 50.0%                                                              |
| Al Marawi'ah     | yes                     | 57                          | 10                          | 0                                   | 2                                    | 0                                           | 0.0%                                                             | n/a                                                                |
| Al Mu'alla       | yes                     | 11                          | 3                           | 2                                   | 2                                    | 2                                           | 66.7%                                                            | 100.0%                                                             |
| Al Omayysi       | yes                     | 45                          | 37                          | 2                                   | 2                                    | 1                                           | 2.7%                                                             | 50.0%                                                              |
| Al Qatn          | yes                     | 52                          | 31                          | 23                                  | 15                                   | 6                                           | 19.4%                                                            | 26.1%                                                              |
| As Sab'in        | yes                     | 42                          | 23                          | 18                                  | 17                                   | 9                                           | 39.1%                                                            | 50.0%                                                              |
| As Safiyah       | yes                     | 8                           | 1                           | 0                                   | 1                                    | 0                                           | 0.0%                                                             | n/a                                                                |
| Ash Sharaf       | yes                     | 63                          | 51                          | 7                                   | 3                                    | 0                                           | 0.0%                                                             | 0.0%                                                               |
| Bani Al Badi     | yes                     | 10                          | 5                           | 0                                   | 0                                    | 0                                           | 0.0%                                                             | n/a                                                                |
| Bani Salamah     | no‡                     | 0                           | 0                           | 0                                   | 0                                    | 0                                           | n/a                                                              | n/a                                                                |
| Eyal Ghafir      | no‡                     | 1                           | 0                           | 0                                   | 0                                    | 0                                           | n/a                                                              | n/a                                                                |
| Mahal Ash Shaykh | yes                     | 36                          | 10                          | 2                                   | 0                                    | 0                                           | 0.0%                                                             | 0.0%                                                               |
| Ma'in            | yes                     | 26                          | 9                           | 5                                   | 5                                    | 3                                           | 33.3%                                                            | 60.0%                                                              |
| Maytam           | yes                     | 76                          | 64                          | 26                                  | 7                                    | 2                                           | 3.1%                                                             | 7.7%                                                               |
| Mukayras         | yes                     | 24                          | 22                          | 10                                  | 0                                    | 0                                           | 0.0%                                                             | 0.0%                                                               |
| Sa'lat Quradah   | yes                     | 35                          | 34                          | 1                                   | 0                                    | 0                                           | 0.0%                                                             | 0.0%                                                               |
| <b>TOTALS</b>    | <b>20/24</b>            | <b>800</b>                  | <b>561</b>                  | <b>205</b>                          | <b>94</b>                            | <b>35</b>                                   | <b>6.2%</b>                                                      | <b>17.1%</b>                                                       |

†Challenges with the local search process. ‡ Subdistrict hard to reach due to security reasons.

317

318

319

320

321 [FIG 2 HERE]

322 Fig 2. Flowchart of steps leading to final cemetery sample, with reasons for exclusion.

323

324

325 [FIG 3 HERE]

326 Fig 3. Map of Yemen governorates, with location of sampled subdistricts (orange-coloured polygons) and  
327 number of cemeteries included in analysis within each subdistrict (blue circles).

328

### 329 Characteristics of included cemeteries

330 Out of the 436 possible cemeteries that passed initial triage and could be geolocated, 18/35 (51.4%) of  
331 cemeteries included were located in an urban setting, compared to 23/378 (5.7%) of those excluded  
332 (Chi-square  $p < 0.001$ ). Of cemeteries included, 27/35 (77.1%) were on sandy terrain, 4/35 (11.4%) were  
333 surrounded by vegetation and the remainder (4/35, 11.4%) on other terrain types; these proportions  
334 were 240/378 (59.9%), 115/378 (28.7%) and 46/378 (11.4%) among excluded cemeteries, respectively  
335 (Chi-square  $p = 0.059$ ).

336 Of the 35 included cemeteries, 9 had two, 15 three, 10 four and one (previously analysed in the pilot  
337 Aden study) had seven analysable images, for a total of 110 images (mean = 3.1 per cemetery). Image  
338 availability was highest from mid-2018 onwards (Fig 4). The median starting number of graves was 317  
339 (IQR 36 to 1110). Of 28 cemeteries with measurable surface area (i.e. excluding seven with a sparse  
340 layout: see Methods), the median starting area value was 3593m<sup>2</sup> (interquartile range, IQR 1072m<sup>2</sup> to  
341 10,312m<sup>2</sup>).

342

343

344 [FIG 4 HERE]

345 Fig 4. Dates on which analysable images (n = 110) were collected, by cemetery (N = 35).

346

### 347 Burial rate patterns

348 Across the 35 cemeteries and 75 inter-image periods, the mean burial rate per day ranged from 0.00 to  
349 2.57, with a median of 0.06 (IQR 0.02 to 0.39). When considering inter-image periods after the first in  
350 each cemetery, the mean burial rate tended to decrease during the years 2013 to 2018 and increase  
351 thereafter (note that the last periods overlap fully or partially with the pandemic; Fig 5). Burial rate by  
352 cemetery is shown in S1 Appendix, Fig S14.

353

354

355 [FIG 5 HERE]

356 Fig 5. Relative change in burial rate from the first inter-image period in each cemetery time series. Each step  
357 function (green line) is one cemetery (all cemeteries start at a baseline of 1, coloured orange).

358

359 Of the three statistical models applied to the data, random forest yielded the best predictive accuracy  
360 despite not accounting for the longitudinal data structure (Fig 6), while the BKMR model was imprecise  
361 and featured considerable downward bias in the largest cemeteries (S1 Appendix, Fig S15). The random  
362 forest and elastic net model suggested that, under observed conditions, overall burials across our  
363 sample were about twice than they would have been if the three crisis proxies (insecurity, wheat price,  
364 displacement) had taken no-crisis counterfactual values, with most cemeteries experiencing elevated  
365 burials. However, the individual-cemetery predicted burial ratios were inconsistent between the two  
366 models (Fig 6). No confidence intervals were computed for these ratios, as no straightforward contrast or  
367 bootstrap method was found to divide random forest predicted distributions given the unknown  
368 correlation between predictions under observed and counterfactual conditions; moreover, the elastic net  
369 regression does not generate meaningful coefficient standard errors. Predictions by cemetery are shown  
370 in S1 Appendix (Fig S16, Fig S17, Fig S18, Fig S19).

371 [FIG 6 HERE]

372 Fig 6. Results of the random forest (panel A) and elastic net (panel B) regression models. The leftmost graphs  
373 show model predictions versus observations (log burial rate for random forest, log incident burials for elastic  
374 net). The rightmost graphs show the ratio of cumulative burials predicted under observed versus  
375 counterfactual (no crisis) conditions for each cemetery and overall, with each square size proportional to the  
376 cemetery's relative contribution to all burials within the sample: note the very different y-axis scales.

377

378 After fitting a BKMR model, the exposure-outcome relationship for each component of the overall  
379 exposure mixture can be visualised by holding the other components constant, as shown in Fig 7. This  
380 analysis suggests that the log burial rate increases linearly as a function of increasing insecurity events,  
381 with (counterintuitively) the opposite pattern for wheat price and no clear association for IDP proportion.  
382 The posterior probabilities of inclusion in the exposure mixture were 1.00, 0.59 and 0.41.

383

384 [FIG 7 HERE]

385 Fig 7. Relationship between each crisis exposure variable in the assumed mixture and the outcome (log burial  
386 rate), when holding the other exposures at their median values, and all other model covariates at their  
387 observed values, as estimated by Bayesian kernel mixture regression (BKMR). Shaded areas indicate 95%  
388 confidence intervals.

389

## 390 Discussion

### 391 Main findings

392 To our knowledge this is the largest-scale and one of the few published analyses of cemetery burial  
393 patterns as detectable from satellite imagery. While this data source may be of minimal utility in settings  
394 with accurate vital events registration, elsewhere, and especially in hard-to-access locations, it is  
395 potentially valuable to generate robust estimates of mortality and excess mortality due to crises or other  
396 public health threats, such as the COVID-19 pandemic, and thereby illuminate the true toll of these  
397 events in terms of its sheerest metric, namely human survival. Combinations of satellite imagery, ground  
398 observations and drone photography have been used recently to quantify old graves in the United States  
399 [34] and document potential war crimes in Syria [35] and Ukraine [36].

400 Contrary to a pilot study in Aden [17], but consistent with subsequent experience in Mogadishu, Somalia  
401 [20], this study presented numerous challenges with identification of cemeteries, quality image  
402 availability and geospatial analysis, which, taken together, impeded our original objective of countrywide,  
403 representative estimation. However, results suggest some broad patterns in terms of mortality during the  
404 crisis and pandemic periods in Yemen, and lay a foundation for further methods development. In our  
405 limited sample of 35 cemeteries, burial rate mostly decreased from baseline during the first years of the  
406 crisis, but increased sharply from 2019 onwards. Alternative models suggested a general pattern of  
407 increased burials compared to counterfactual scenarios in which key proxy variables for crisis conditions  
408 were held at the assumed no-crisis baseline. The incidence of insecurity events seemed to be  
409 associated with increasing burial rate, but the opposite was seen for the price of wheat.

410

### 411 Limitations

412 Despite its nationally representative design, the study achieved a much-reduced sample, with evidence  
413 of selection bias towards urban locations. Rural locations with relatively small and not well-visible  
414 cemeteries, underrepresented in our sample, would plausibly have experienced higher mortality and thus  
415 burial. Therefore, inference about burial patterns across Yemen is severely limited. In addition, statistical  
416 results are potentially subject to random or systematic error due to inaccuracy in the model predictors  
417 used and in geospatial techniques to count graves and measure cemetery surface area. As findings do  
418 not feature confidence intervals, sampling variability and error in the imputation model for missing grave  
419 counts are not visualisable, impeding statistical significance assessment. The predictors and  
420 counterfactual assumptions used in the statistical model are limited and could have included additional  
421 variables that may be proxies of crisis conditions, such as climate.

422 While we attempted to reduce geospatial analysis error by omitting low-quality and otherwise  
423 problematic images from statistical analysis, some error is likely to have affected the final dataset. We  
424 assumed a planar terrain despite Yemen featuring many mountainous areas, which could have produced

425 underestimation of surface area and problems with image orthorectification and alignment. Despite  
426 intensive expert supervision, the crowd worker approach carries a risk that serious analyst error may go  
427 unobserved: had resources been greater, this approach should have been validated more rigorously.  
428 Generally, this unprecedented study highlights key challenges (Table 1) of analysing cemetery satellite  
429 images and identifying / counting graves across a variety of terrains and burial typologies given current  
430 imagery resolution. It is also possible that in locations with very high levels of violence, mass graves or  
431 less formal burials would have remained undetected by our analysis.

432

### 433 Conclusions and ways forward

434 This analysis provides limited evidence on the possible excess in burials and thus population mortality  
435 attributable to crisis conditions in Yemen since 2014. It also documents a number of challenges that  
436 other analysts may encounter when attempting a similar analysis. In addition to some of the problems we  
437 describe above, the ethics of remote satellite imagery analysis, and particularly how to involve local  
438 actors in analyses without endangering their security, deserves careful consideration.

439 Based on experience to date, we believe that long-term monitoring of well-selected sites, particularly in  
440 urban settings where cemeteries are likely to be more visible and imagery cover greater, is a reasonable  
441 option for mortality estimation in settings where other methods are impracticable and the population  
442 universally uses cemeteries. Whether nationally or regionally representative estimates of burial trends  
443 are feasible using satellite imagery remains unclear. Acquisition of customised imagery is a service  
444 provided by satellite imagery companies and, while much more expensive than archive imagery, could  
445 greatly improve data quality. Furthermore, our experience suggests several avenues for methodological  
446 improvement. Estimating the proportion of graves likely to be missed based on image characteristics and  
447 quality and correcting grave counts accordingly, rather than omitting the image from analysis altogether,  
448 could greatly increase data quantity. Automated image quality metrics [37] could also be considered. The  
449 assumption of planar terrain could be relaxed by integrating elevation data (e.g. the Advanced  
450 Spaceborne Thermal Emission and Reflection Radiometer Global Digital Elevation Model [38]) in  
451 orthorectification or, more labour-intensively, placing a far greater number of tie-points in each  
452 consecutive image. The value of automated annotation of graves should be reviewed: on the one hand,  
453 asking human annotators to identify graves from scratch may be less confusing and more accurate; on  
454 the other hand, further validation of machine learning algorithms could greatly streamline analysis and  
455 reduce costs considerably, as suggested by a pilot analysis of cemeteries in North and South Korea [39].  
456 Another cost-saving measure could be to invite citizen volunteers to perform annotation work. As regards  
457 study design, our experience suggests that purposeful selection of a few 'sentinel sites', with frequent  
458 observations per site, would be preferable to this study's attempt at representative sample. Such sentinel  
459 time series could be combined with predictors, as in this analysis, to train and validate a model that  
460 predicts burial patterns indirectly, even where no imagery data are available. Satellite imagery analysis

461 should not be a substitute for strengthening vital events registration and undertaking ground mortality  
462 estimation where possible, but does warrant further exploration and testing in a variety of settings.

463

## 464 Acknowledgments

465 The study was funded by the United Kingdom Foreign Commonwealth and Development Office through  
466 separate grants to the LSHTM (grant reference 300708-139) and the Satellite Applications Catapult  
467 (grant reference 300680-104). Funders were not involved in study design, data collection, analysis, or  
468 manuscript preparation.

469 We are grateful to Louise Mellor, Fergus McBean and other colleagues at the United Kingdom Foreign  
470 Commonwealth and Development Office for support. At the LSHTM, we are grateful to Lucy Bell and  
471 Catherine McGowan for project management support. The Satellite Applications Catapult would like to  
472 thank all the staff at 1715 Labs for their support throughout this project. We also acknowledge numerous  
473 Yemeni geographers and civil society members who helped our team identify potential cemeteries,  
474 including Odai Al-Masni, who fulfils authorship criteria but could not be reached when this paper was  
475 being drafted.

476

## 477 References

- 478 1. United Nations Office for Coordination of Humanitarian Affairs. Yemen Situation Report. OCHA. 2023.  
479 <https://www.unocha.org/yemen>. Accessed 10 Feb 2023.
- 480 2. Maxwell D, Hailey P, Spainhour Baker L, Kim JJ. Constraints and Complexities of Information and  
481 Analysis in Humanitarian Emergencies: Evidence from Yemen. Feinstein International Center, Tufts  
482 University and Centre for Humanitarian Change; 2019.
- 483 3. Armed Conflict Location & Event Data Project (ACLED). Research Hub: War in Yemen. 2023.  
484 <https://acleddata.com/research-hub-war-in-yemen/>. Accessed 10 Feb 2023.
- 485 4. Dureab F, Al-Falahi E, Ismail O, Al-Marhali L, Al Jawaldeh A, Nuri NN, et al. An Overview on Acute  
486 Malnutrition and Food Insecurity among Children during the Conflict in Yemen. *Children*. 2019;6:77.
- 487 5. Hashim HT, Miranda AV, Babar MS, Essar MY, Hussain H, Ahmad S, et al. Yemen's triple  
488 emergency: Food crisis amid a civil war and COVID-19 pandemic. *Public Health in Practice*.  
489 2021;2:100082.
- 490 6. AlKarim T, Abbara A, Attal B. Armed conflict alone does not explain the devastation of Yemen's health  
491 system. *BMJ Glob Health*. 2021;6:e004740.



- 492 7. Alsabri M, Alsakkaf L, Alhadheri A, Cole J, Burkle Jr. F. Chronic Health Crises and Emergency  
493 Medicine in War-torn Yemen, Exacerbated by the COVID-19 Pandemic. *WestJEM*. 2022;23:276–84.
- 494 8. Checchi F, Koum Besson ES. Reconstructing subdistrict-level population denominators in Yemen  
495 after six years of armed conflict and forced displacement. *Journal of Migration and Health*.  
496 2022;5:100105.
- 497 9. Camacho A, Bouhenia M, Alyusfi R, Alkohlani A, Naji MAM, de Radiguès X, et al. Cholera epidemic in  
498 Yemen, 2016–18: an analysis of surveillance data. *The Lancet Global Health*. 2018;6:e680–90.
- 499 10. Alsabri M, Alhadheri A, Alsakkaf LM, Cole J. Conflict and COVID-19 in Yemen: beyond the  
500 humanitarian crisis. *Global Health*. 2021;17:83.
- 501 11. Rahmat ZS, Islam Z, Mohanan P, Kokash DM, Essar MY, Hasan MM, et al. Food Insecurity during  
502 COVID-19 in Yemen. *The American Journal of Tropical Medicine and Hygiene*. 2022;106:1589–92.
- 503 12. Kotiso M, Qirbi N, Al-Shabi K, Vuolo E, Al-Waleedi A, Naiene J, et al. Impact of the COVID-19  
504 pandemic on the utilisation of health services at public hospitals in Yemen: a retrospective comparative  
505 study. *BMJ Open*. 2022;12:e047868.
- 506 13. Mikkelsen L, Phillips DE, AbouZahr C, Setel PW, de Savigny D, Lozano R, et al. A global  
507 assessment of civil registration and vital statistics systems: monitoring data quality and progress. *The*  
508 *Lancet*. 2015;386:1395–406.
- 509 14. Brolan CE, Gouda H. Civil Registration and Vital Statistics, Emergencies, and International Law:  
510 Understanding the Intersection. *Medical Law Review*. 2017;25:314–39.
- 511 15. Assessing the Impact of War on Development in Yemen | United Nations Development Programme.  
512 UNDP. <https://www.undp.org/yemen/publications/assessing-impact-war-development-yemen>. Accessed  
513 10 Feb 2023.
- 514 16. Alhaffar M, Basaleem H, Othman F, Alsakkaf K, Naji SMM, Kolaise H, et al. Adult mortality before  
515 and during the first wave of COVID-19 pandemic in nine communities of Yemen: a key informant study.  
516 *Confl Health*. 2022;16:63.
- 517 17. Koum Besson ES, Norris A, Bin Ghouth AS, Freemantle T, Alhaffar M, Vazquez Y, et al. Excess  
518 mortality during the COVID-19 pandemic: a geospatial and statistical analysis in Aden governorate,  
519 Yemen. *BMJ Glob Health*. 2021;6:e004564.
- 520 18. COVID-19 pandemic in Yemen. Wikipedia. 2022.

- 521 19. Raleigh C, Linke A, Hegre H, Karlsen J. Introducing ACLED-Armed Conflict Location and Event  
522 Data. *Journal of Peace Research*. 2010;47:1–10.
- 523 20. Warsame A, Bashir F, Freemantle T, Williams C, Vazquez Y, Reeve C, et al. Excess mortality during  
524 the COVID-19 pandemic: a geospatial and statistical analysis in Mogadishu, Somalia. *International*  
525 *Journal of Infectious Diseases*. 2021;113:190–9.
- 526 21. Yemen Central Statistical Organisation. Yemen - Roads. Humanitarian Data Exchange. 2018.  
527 <https://data.humdata.org/dataset/yemen-roads>. Accessed 16 Dec 2021.
- 528 22. Humanitarian OpenStreetMap Team. Yemen Health Facilities (OpenStreetMap Export).  
529 Humanitarian Data Exchange. 2020. [https://data.humdata.org/dataset/hotosm\\_yem\\_health\\_facilities](https://data.humdata.org/dataset/hotosm_yem_health_facilities).  
530 Accessed 16 Dec 2021.
- 531 23. Ministry of Public Health and Population - MOPHP/Yemen, Central Statistical Organization -  
532 CSO/Yemen, Pan Arab Program for Family Health - PAPFAM, ICF International. Yemen National Health  
533 and Demographic Survey 2013. Rockville, Maryland, USA: MOPHP, CSO, PAPFAM, and ICF  
534 International; 2015.
- 535 24. United Nations World Food Programme. Yemen - Food Prices - Humanitarian Data Exchange.  
536 <https://data.humdata.org/dataset/wfp-food-prices-for-yemen>. Accessed 10 Feb 2023.
- 537 25. Vidhya GR, Ramesh H. Effectiveness of Contrast Limited Adaptive Histogram Equalization  
538 Technique on Multispectral Satellite Imagery. In: *Proceedings of the International Conference on Video*  
539 *and Image Processing*. Singapore Singapore: ACM; 2017. p. 234–9.
- 540 26. Mustafa WA, Abdul Kader MMM. A Review of Histogram Equalization Techniques in Image  
541 Enhancement Application. *J Phys: Conf Ser*. 2018;1019:012026.
- 542 27. Unsharp masking. Wikipedia. 2022.
- 543 28. NW 1615 L. St, Washington S 800, Inquiries D 20036 U-419-4300 | M-857-8562 | F-419-4372 | M. 4.  
544 *Turkers in this canvassing: young, well-educated and frequent users*. Pew Research Center: Internet,  
545 *Science & Tech*. 2016. [https://www.pewresearch.org/internet/2016/07/11/turkers-in-this-canvassing-](https://www.pewresearch.org/internet/2016/07/11/turkers-in-this-canvassing-young-well-educated-and-frequent-users/)  
546 [young-well-educated-and-frequent-users/](https://www.pewresearch.org/internet/2016/07/11/turkers-in-this-canvassing-young-well-educated-and-frequent-users/). Accessed 10 Feb 2023.
- 547 29. Brodzik MJ, Billingsley B, Haran T, Raup B, Savoie MH. EASE-Grid 2.0: Incremental but Significant  
548 Improvements for Earth-Gridded Data Sets. *IJGI*. 2012;1:32–45.
- 549 30. Wright MN, Ziegler A. ranger: A Fast Implementation of Random Forests for High Dimensional Data  
550 in C++ and R. *Journal of Statistical Software*. 2017;77:1–17.

- 551 31. Friedman J, Hastie T, Tibshirani R. Regularization Paths for Generalized Linear Models via  
552 Coordinate Descent. *J Stat Soft.* 2010;33.
- 553 32. Bobb JF, Valeri L, Claus Henn B, Christiani DC, Wright RO, Mazumdar M, et al. Bayesian kernel  
554 machine regression for estimating the health effects of multi-pollutant mixtures. *Biostatistics.*  
555 2015;16:493–508.
- 556 33. Bobb JF, Claus Henn B, Valeri L, Coull BA. Statistical software for analyzing the health effects of  
557 multiple concurrent exposures via Bayesian kernel machine regression. *Environ Health.* 2018;17:67.
- 558 34. Spera SA, Franklin MS, Zizzamia EA, Smith RK. Recovering a Black Cemetery: Automated Mapping  
559 of Hidden Gravesites Using an sUAV and GIS in East End Cemetery, Richmond, VA. *Int J Histor*  
560 *Archaeol.* 2022;26:1110–31.
- 561 35. Investigating Mass Graves using Satellite Imagery. Syria Justice & Accountability Centre. 2022.  
562 <https://syriaaccountability.org/mass-graves-using-satellite-imagery/>. Accessed 10 Feb 2023.
- 563 36. El-Sherbiny E, den Braber B. Mass graves after the Russian invasion: Bucha, Mariupol, Chernihiv,  
564 Kherson. London: Centre for Information Resilience; 2022.
- 565 37. CPBD | Image, Video, and Usability Lab. <https://ivulab.asu.edu/software/cpbd/>. Accessed 10 Feb  
566 2023.
- 567 38. Abrams M, Crippen R, Fujisada H. ASTER Global Digital Elevation Model (GDEM) and ASTER  
568 Global Water Body Dataset (ASTWBD). *Remote Sensing.* 2020;12:1156.
- 569 39. Lunga D, Dhamdhare R, Walters S, Bragg L, Makkar N, Urban M. Learning to Count Grave Sites for  
570 Cemetery Observation Models With Satellite Imagery. *IEEE Geosci Remote Sensing Lett.* 2022;19:1–5.
- 571

572 **S1 Appendix. Additional figures and tables.**

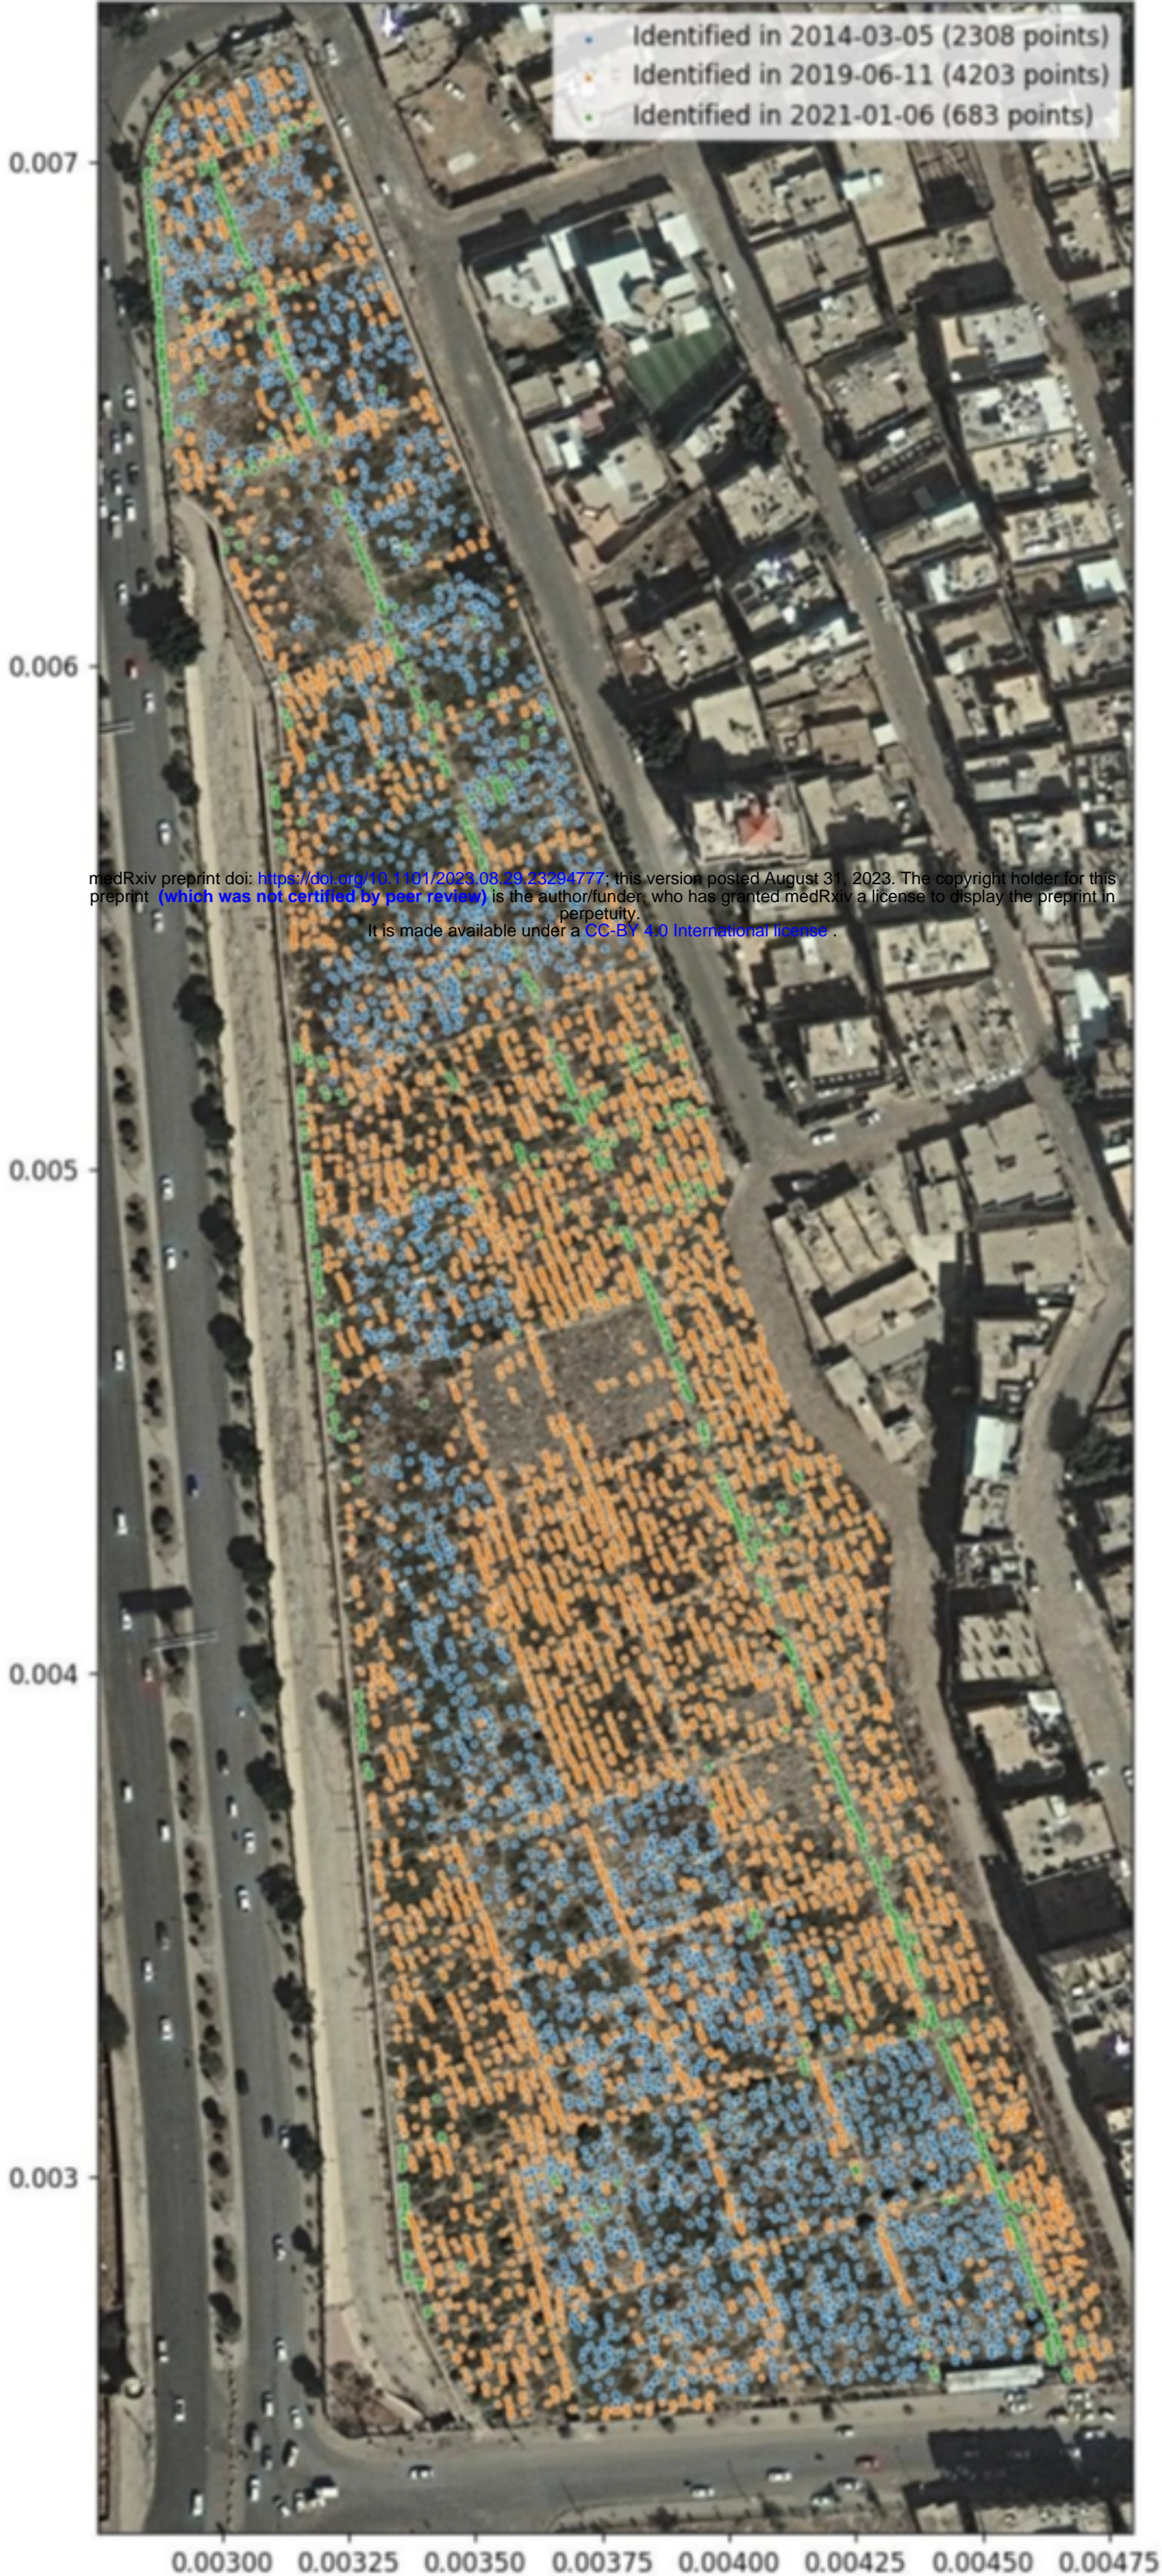

medRxiv preprint doi: <https://doi.org/10.1101/2023.08.29.23294777>; this version posted August 31, 2023. The copyright holder for this preprint (which was not certified by peer review) is the author/funder, who has granted medRxiv a license to display the preprint in perpetuity.  
It is made available under a [CC-BY 4.0 International license](https://creativecommons.org/licenses/by/4.0/).

Figure 1

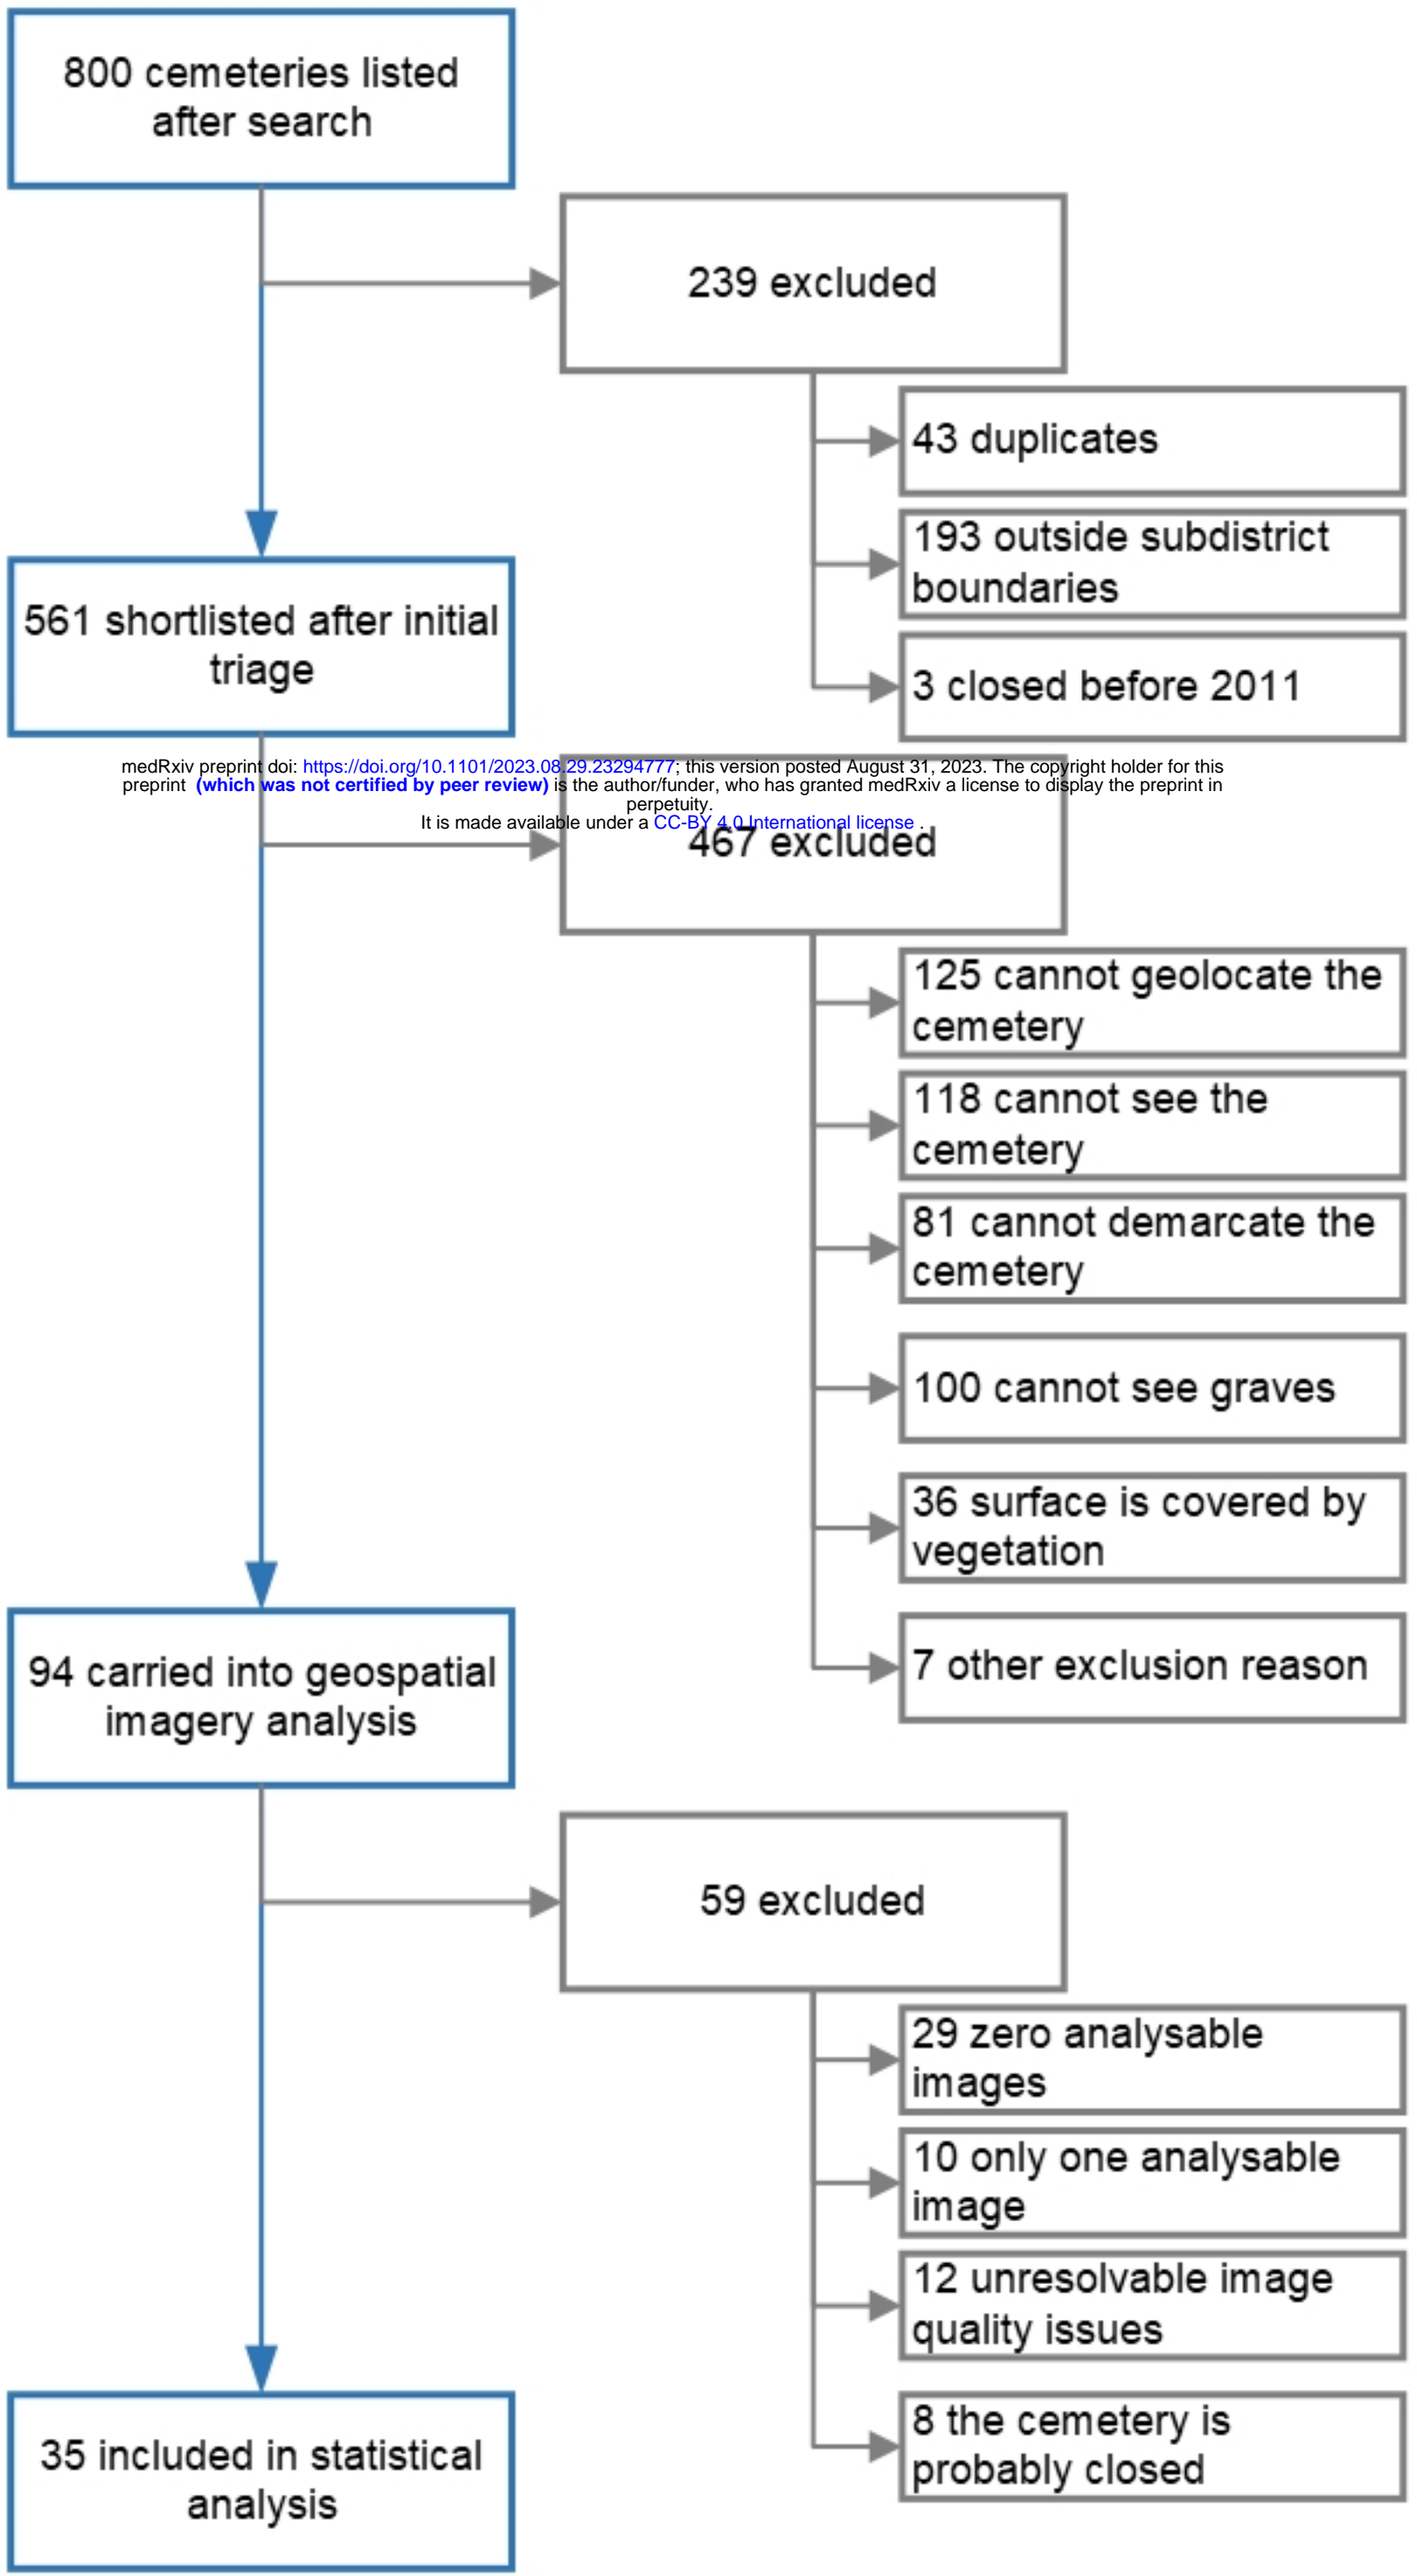

Figure 2

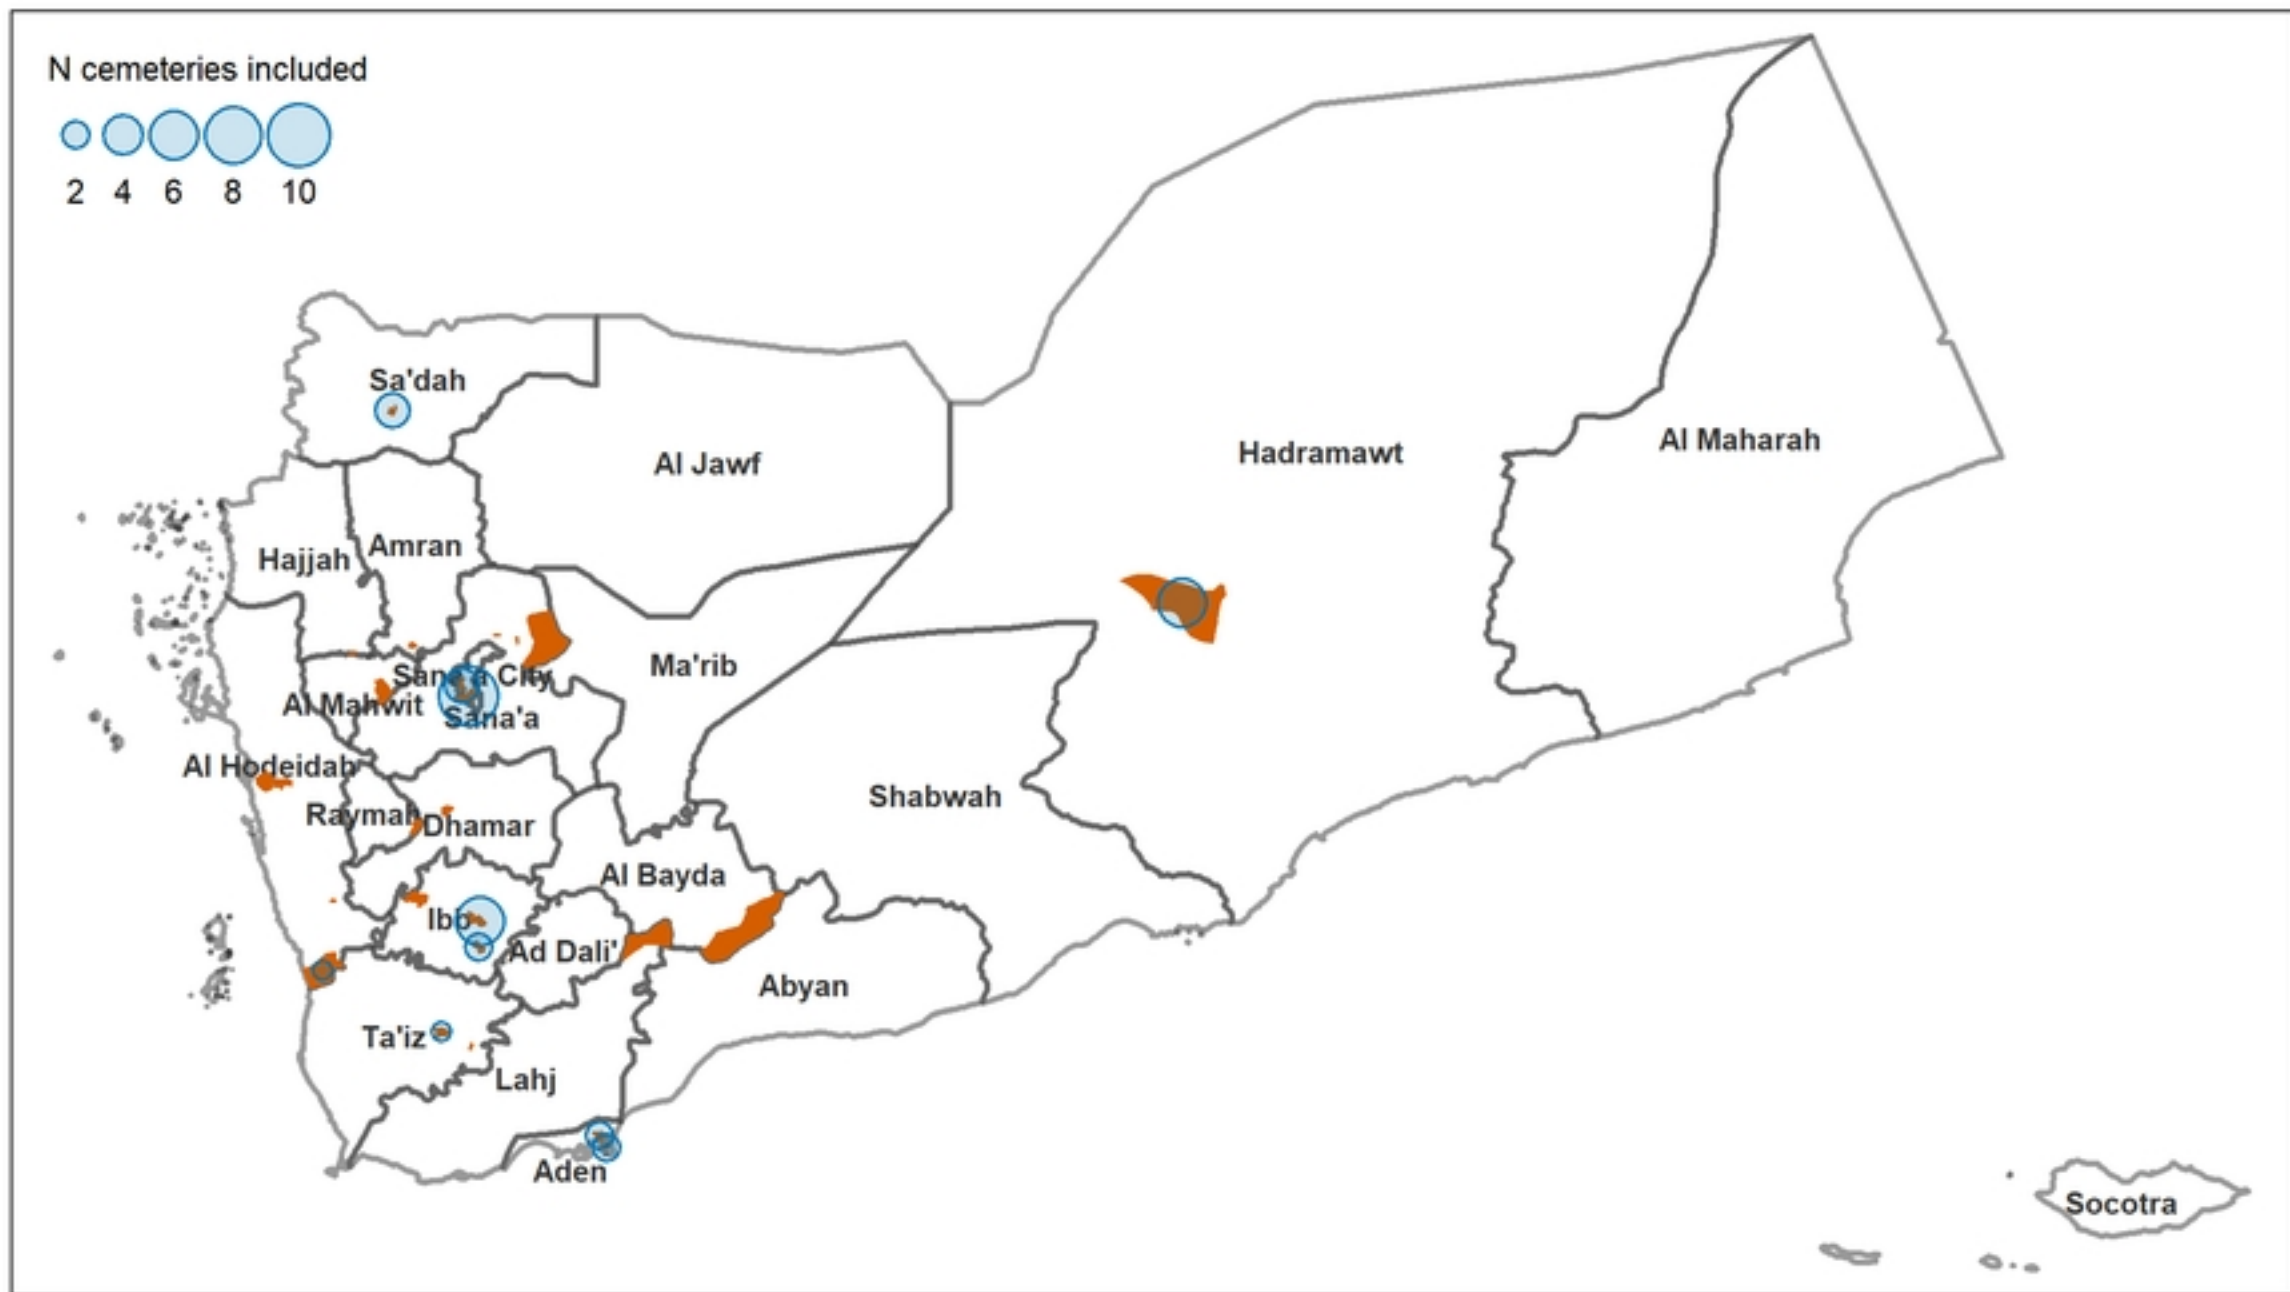

Figure 3

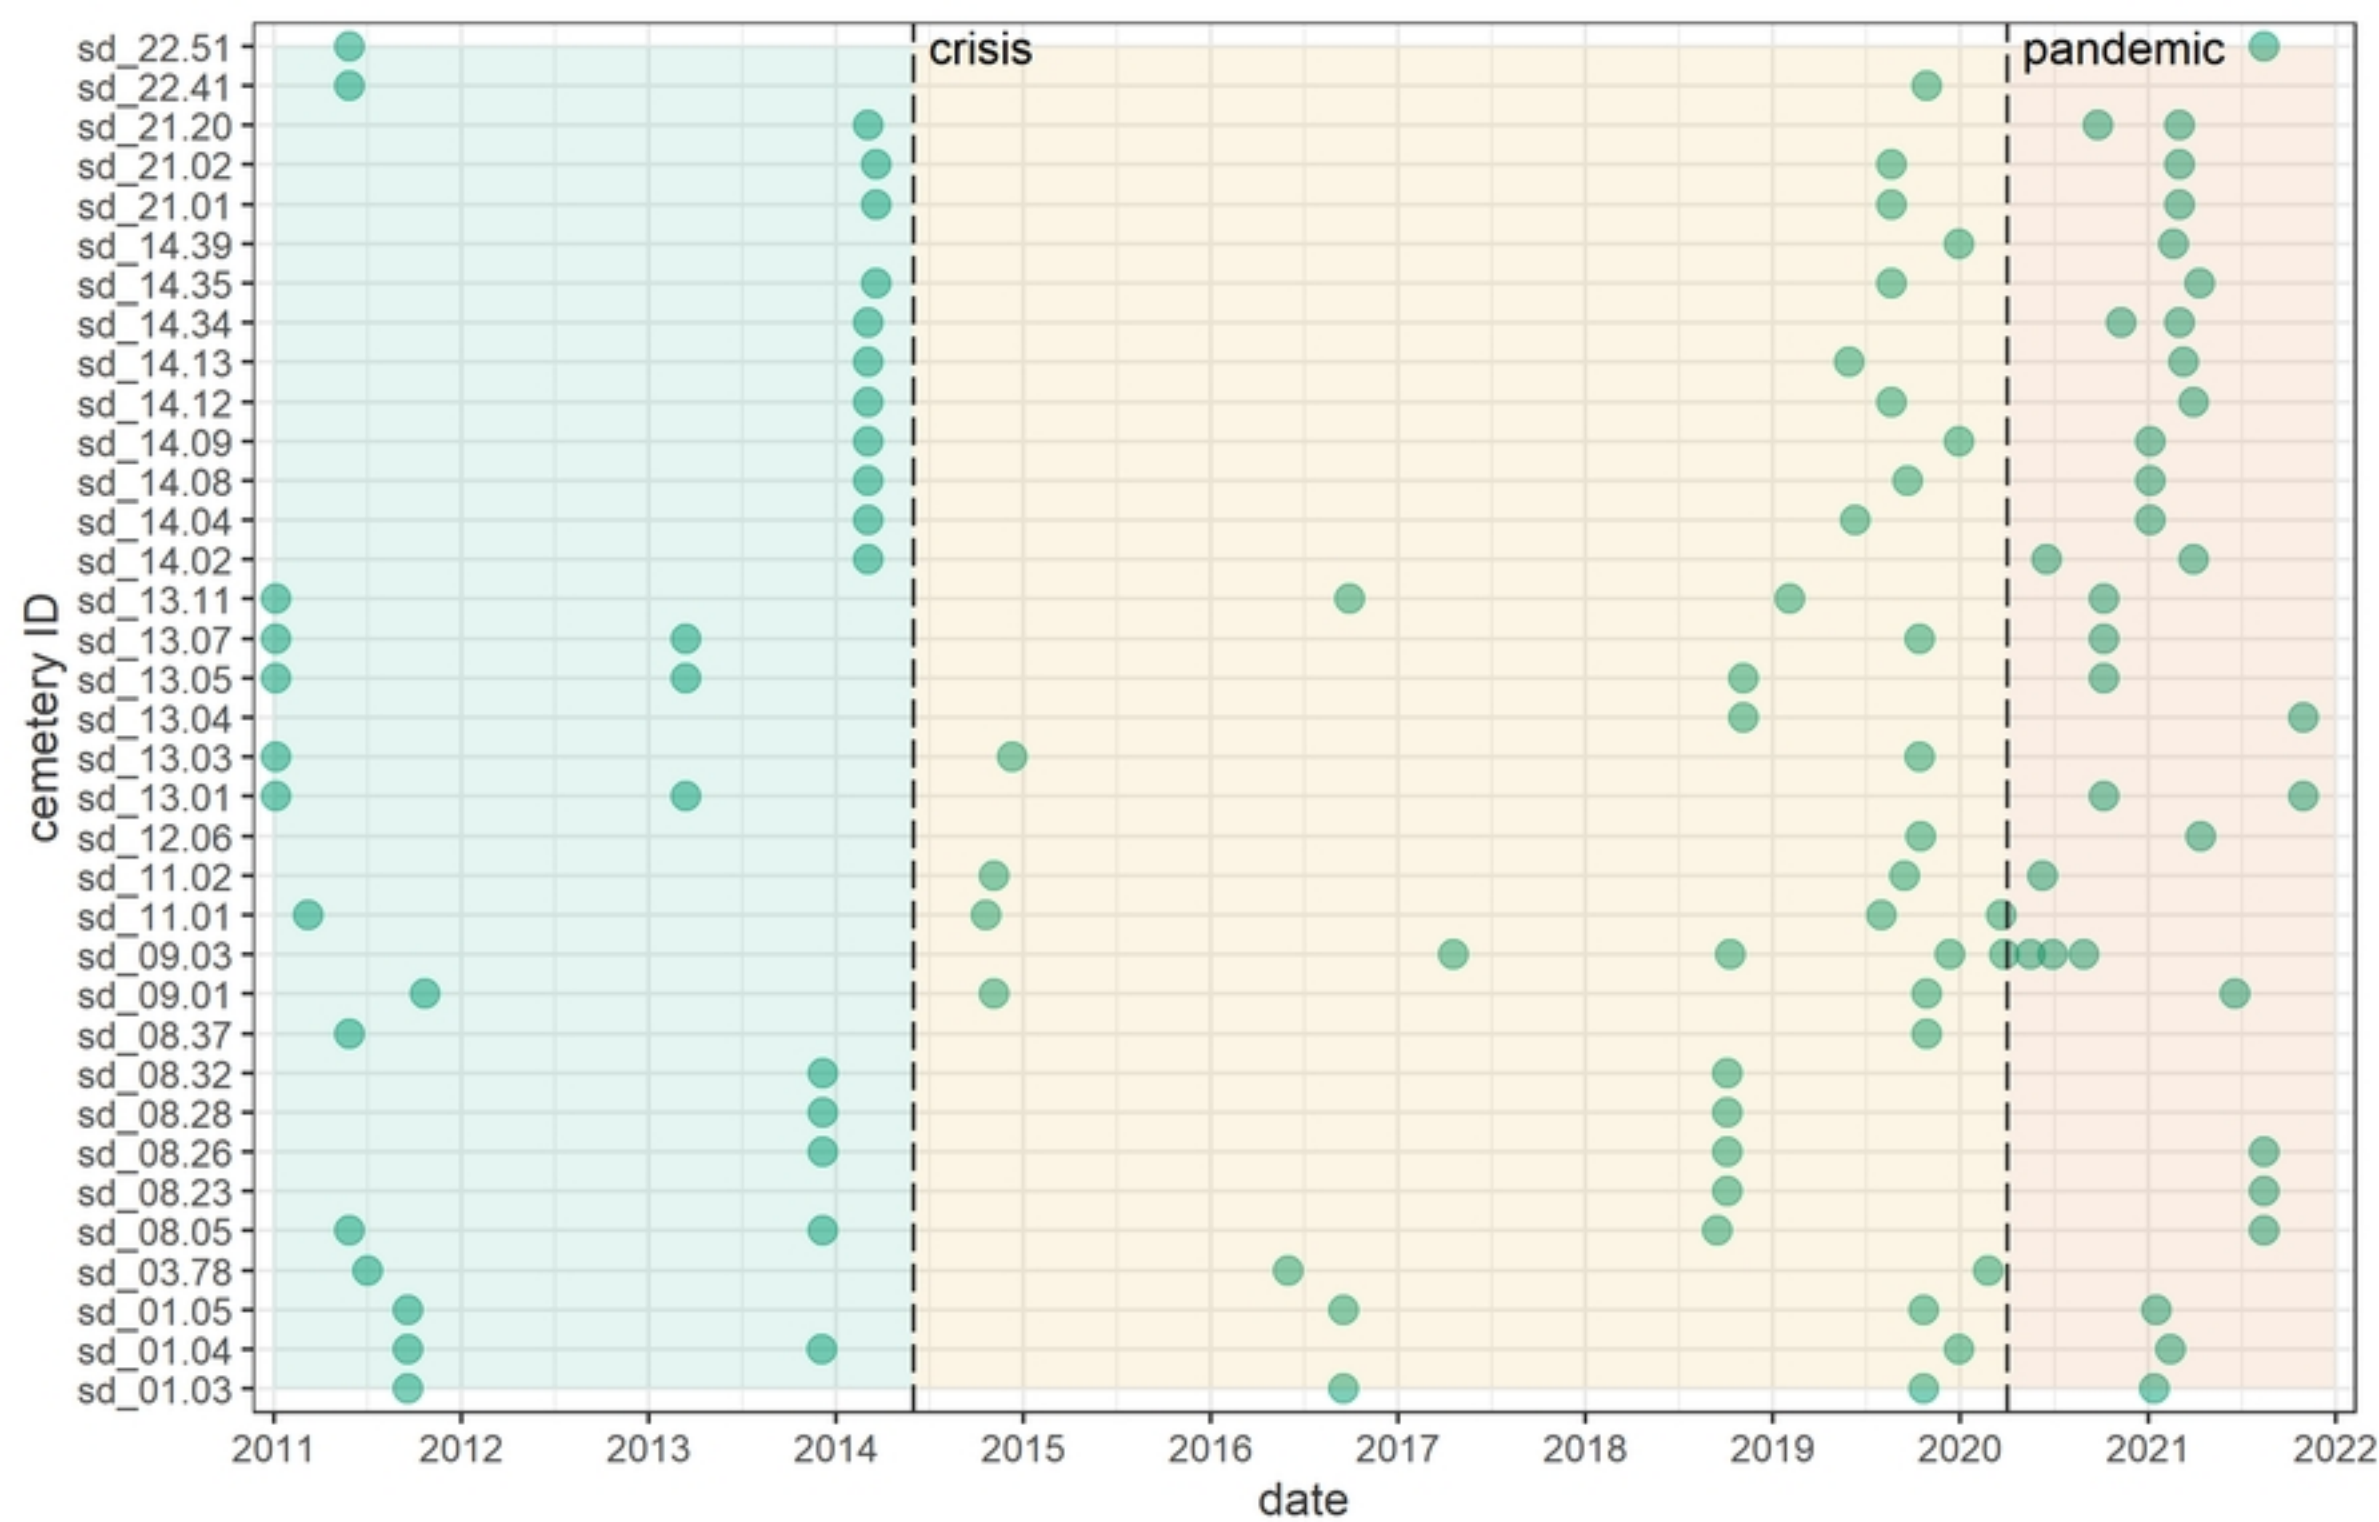

Figure 4



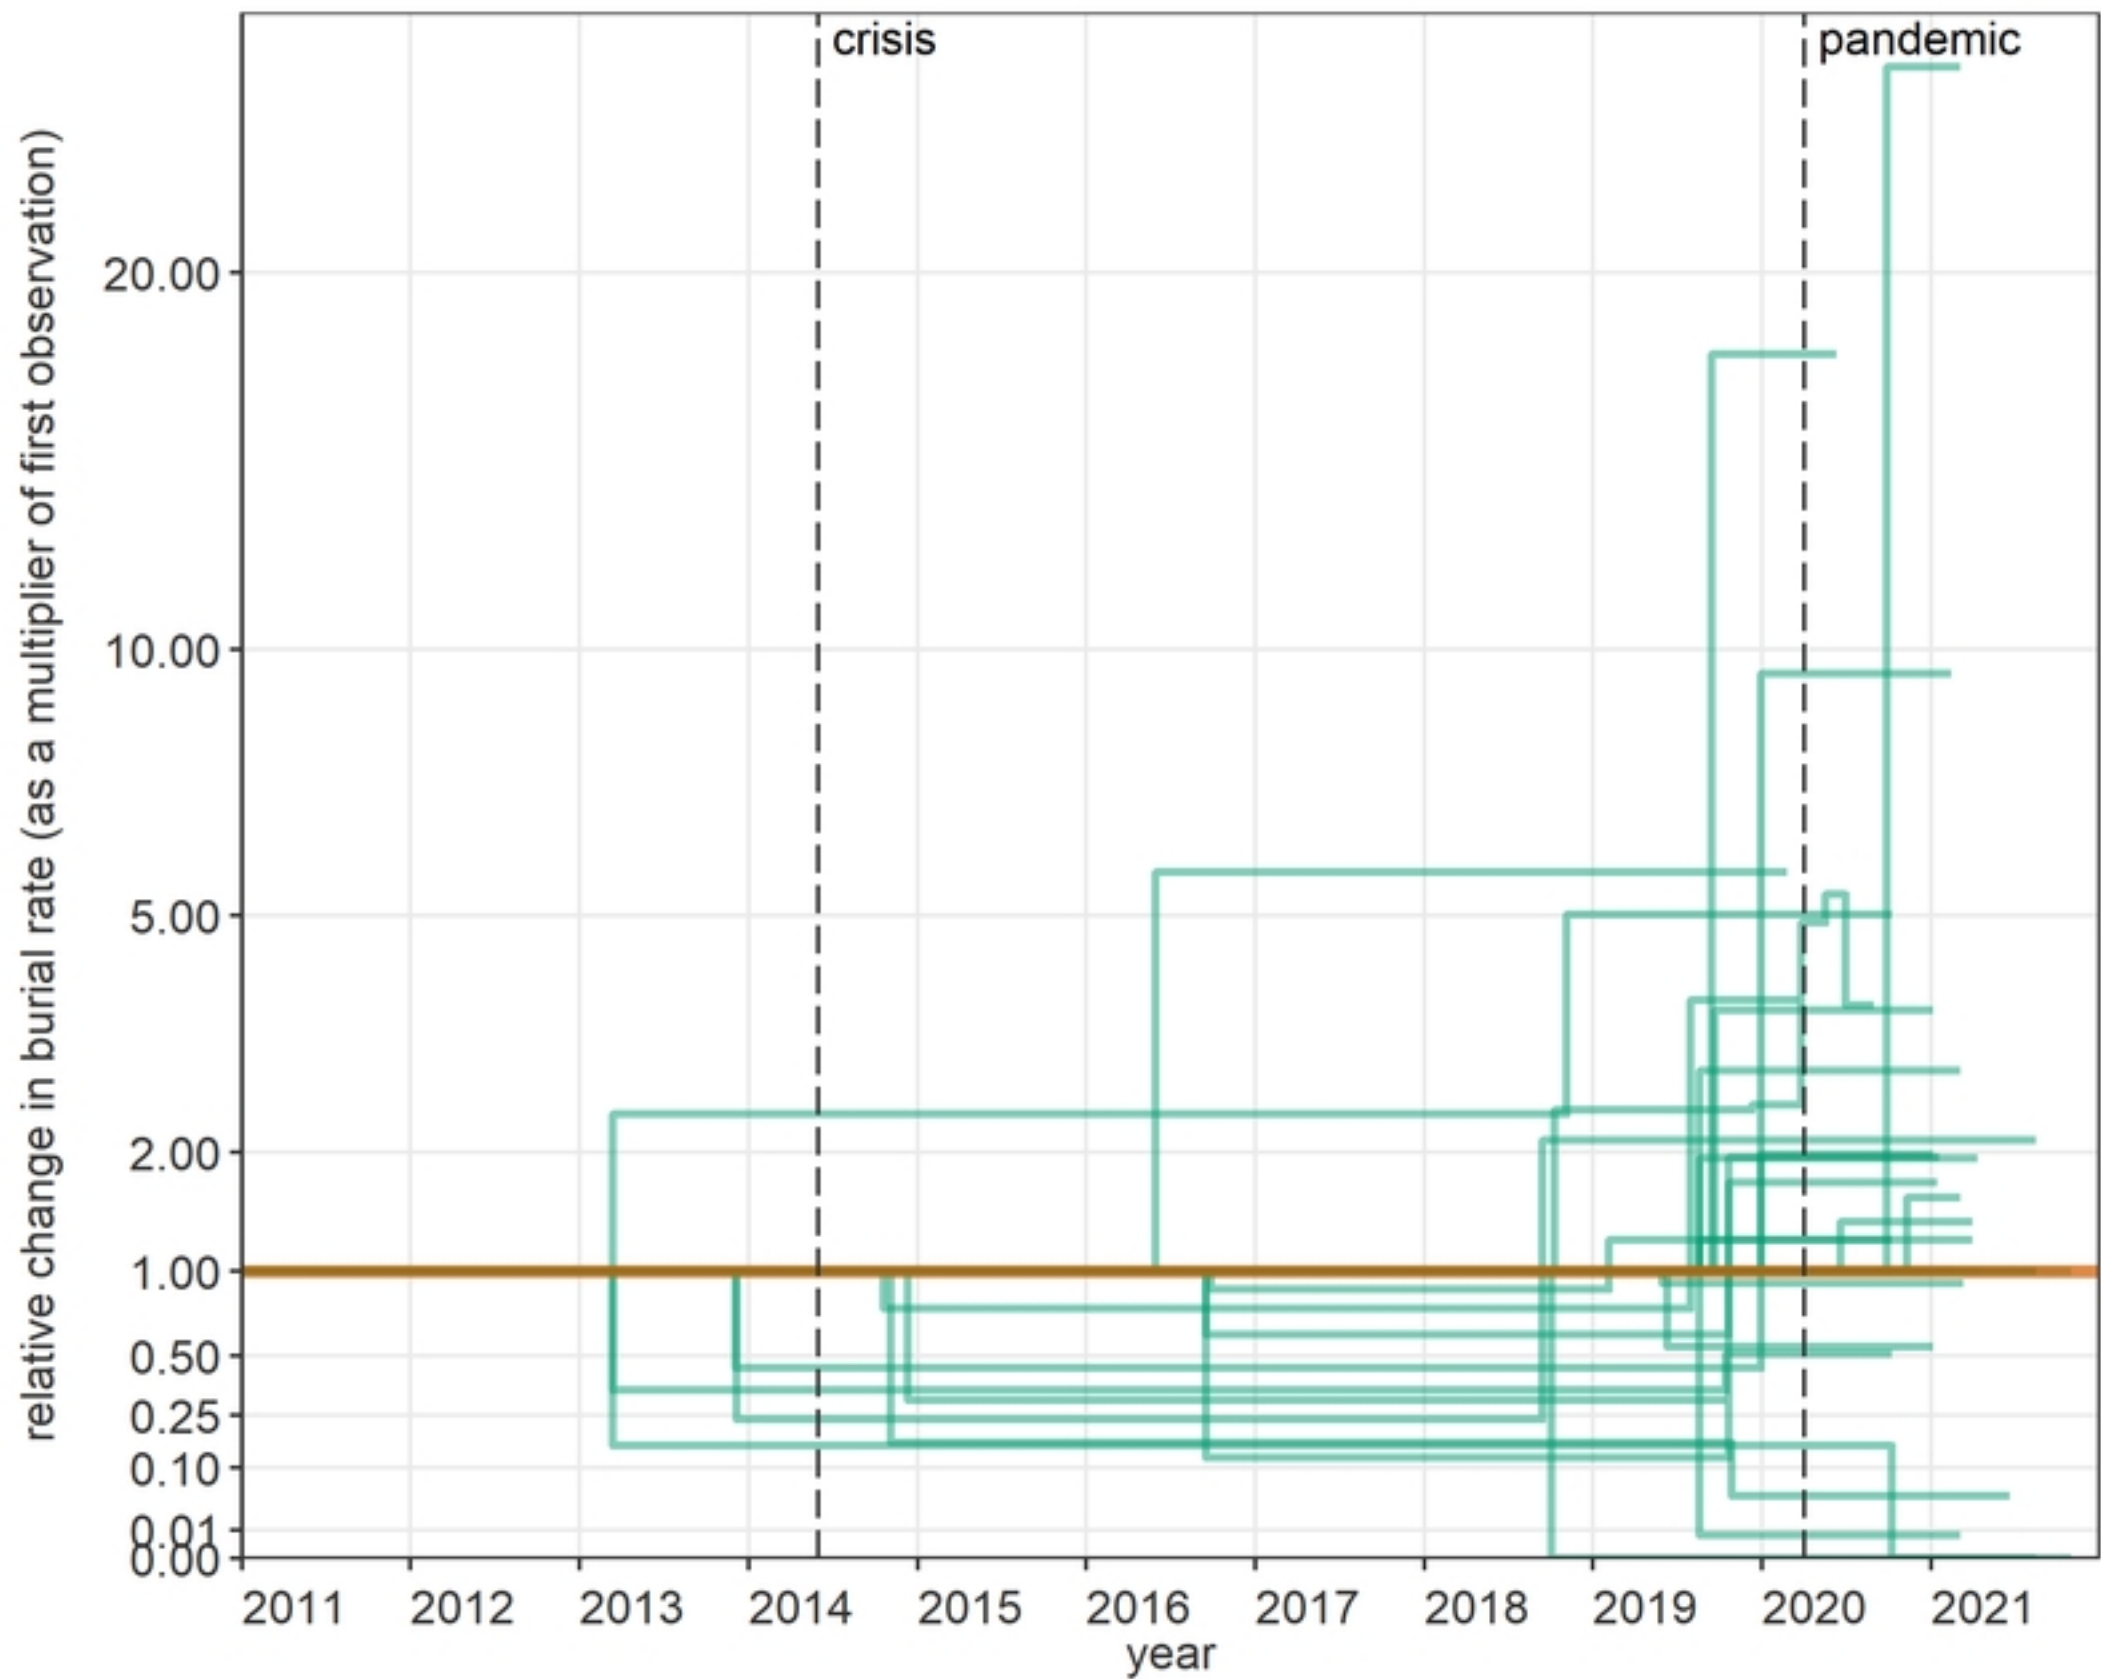

Figure 5

**A: Random forest**

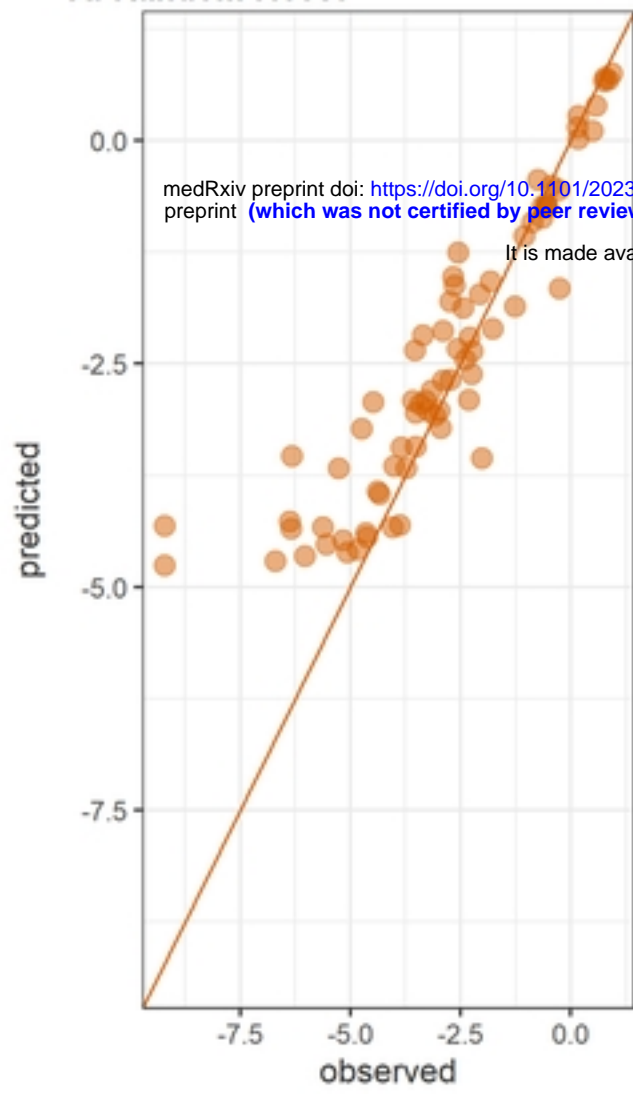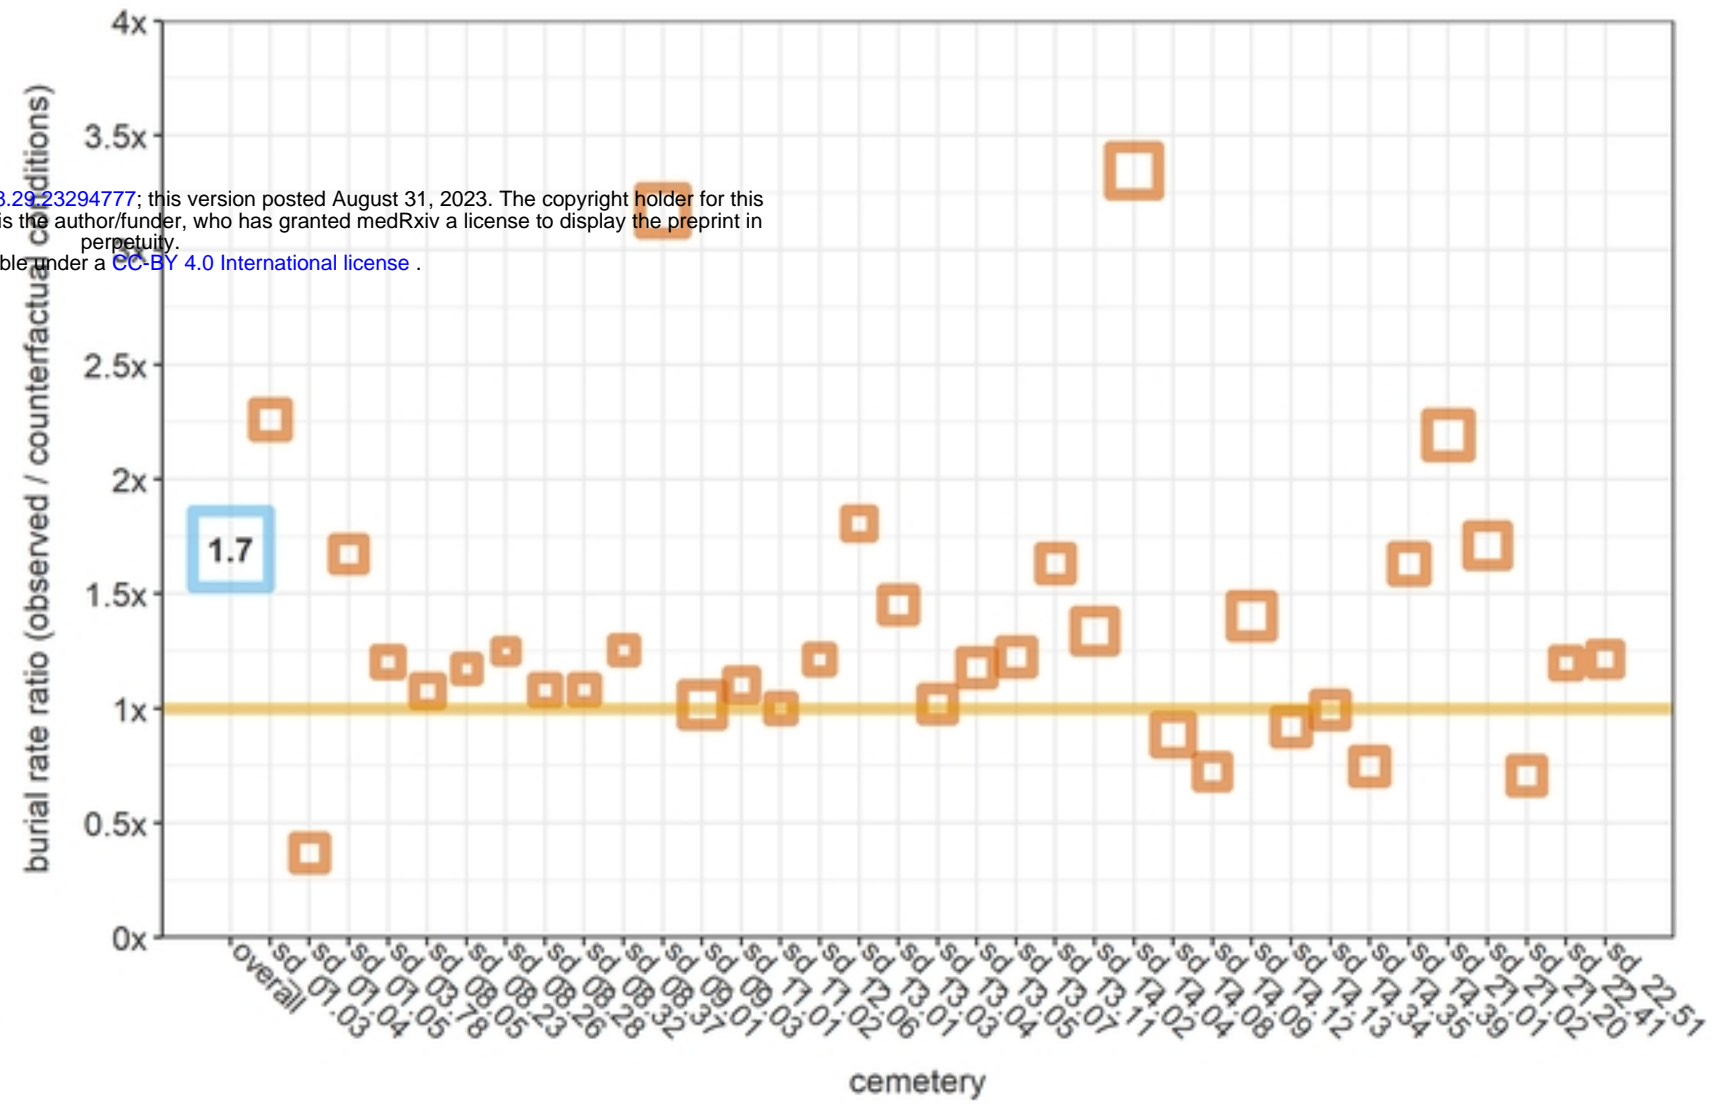

**B: Elastic net regression**

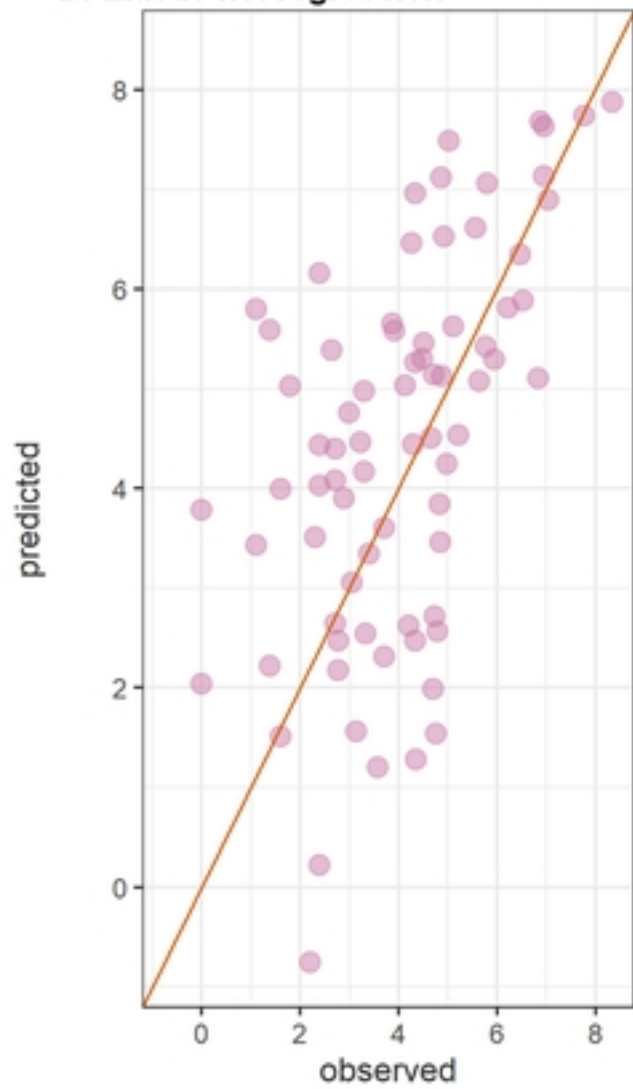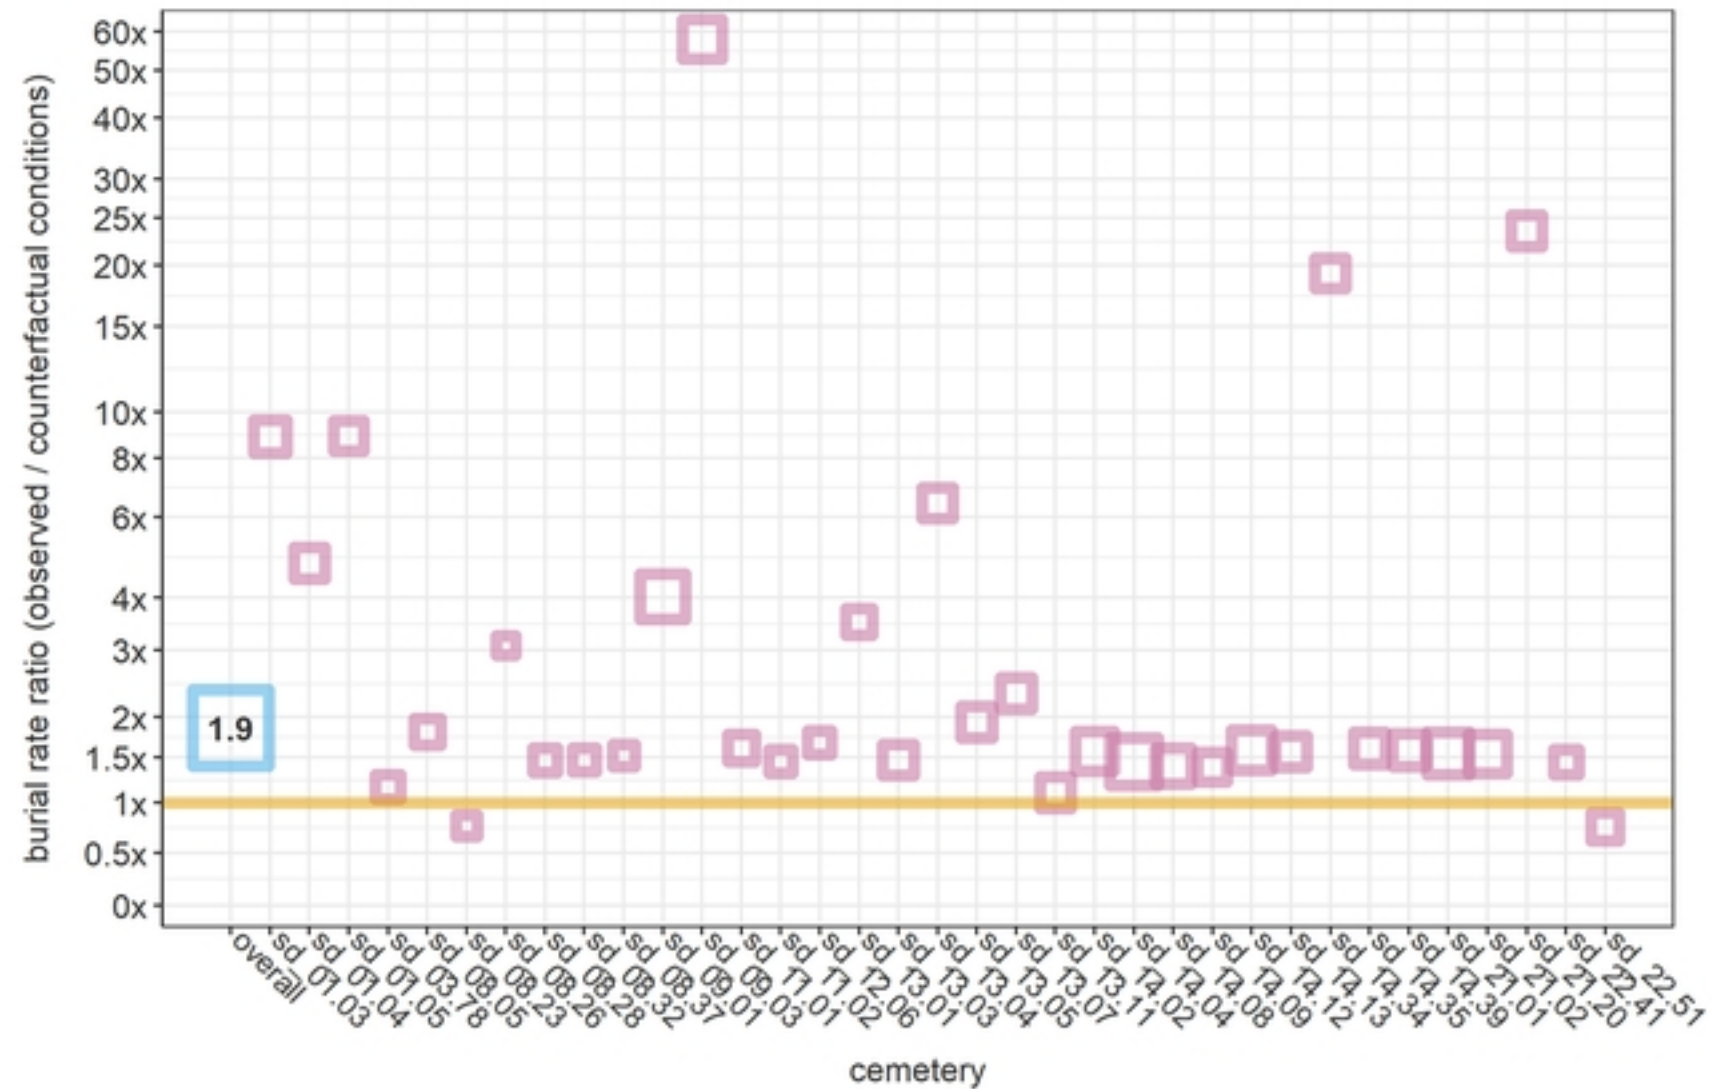

Figure 6

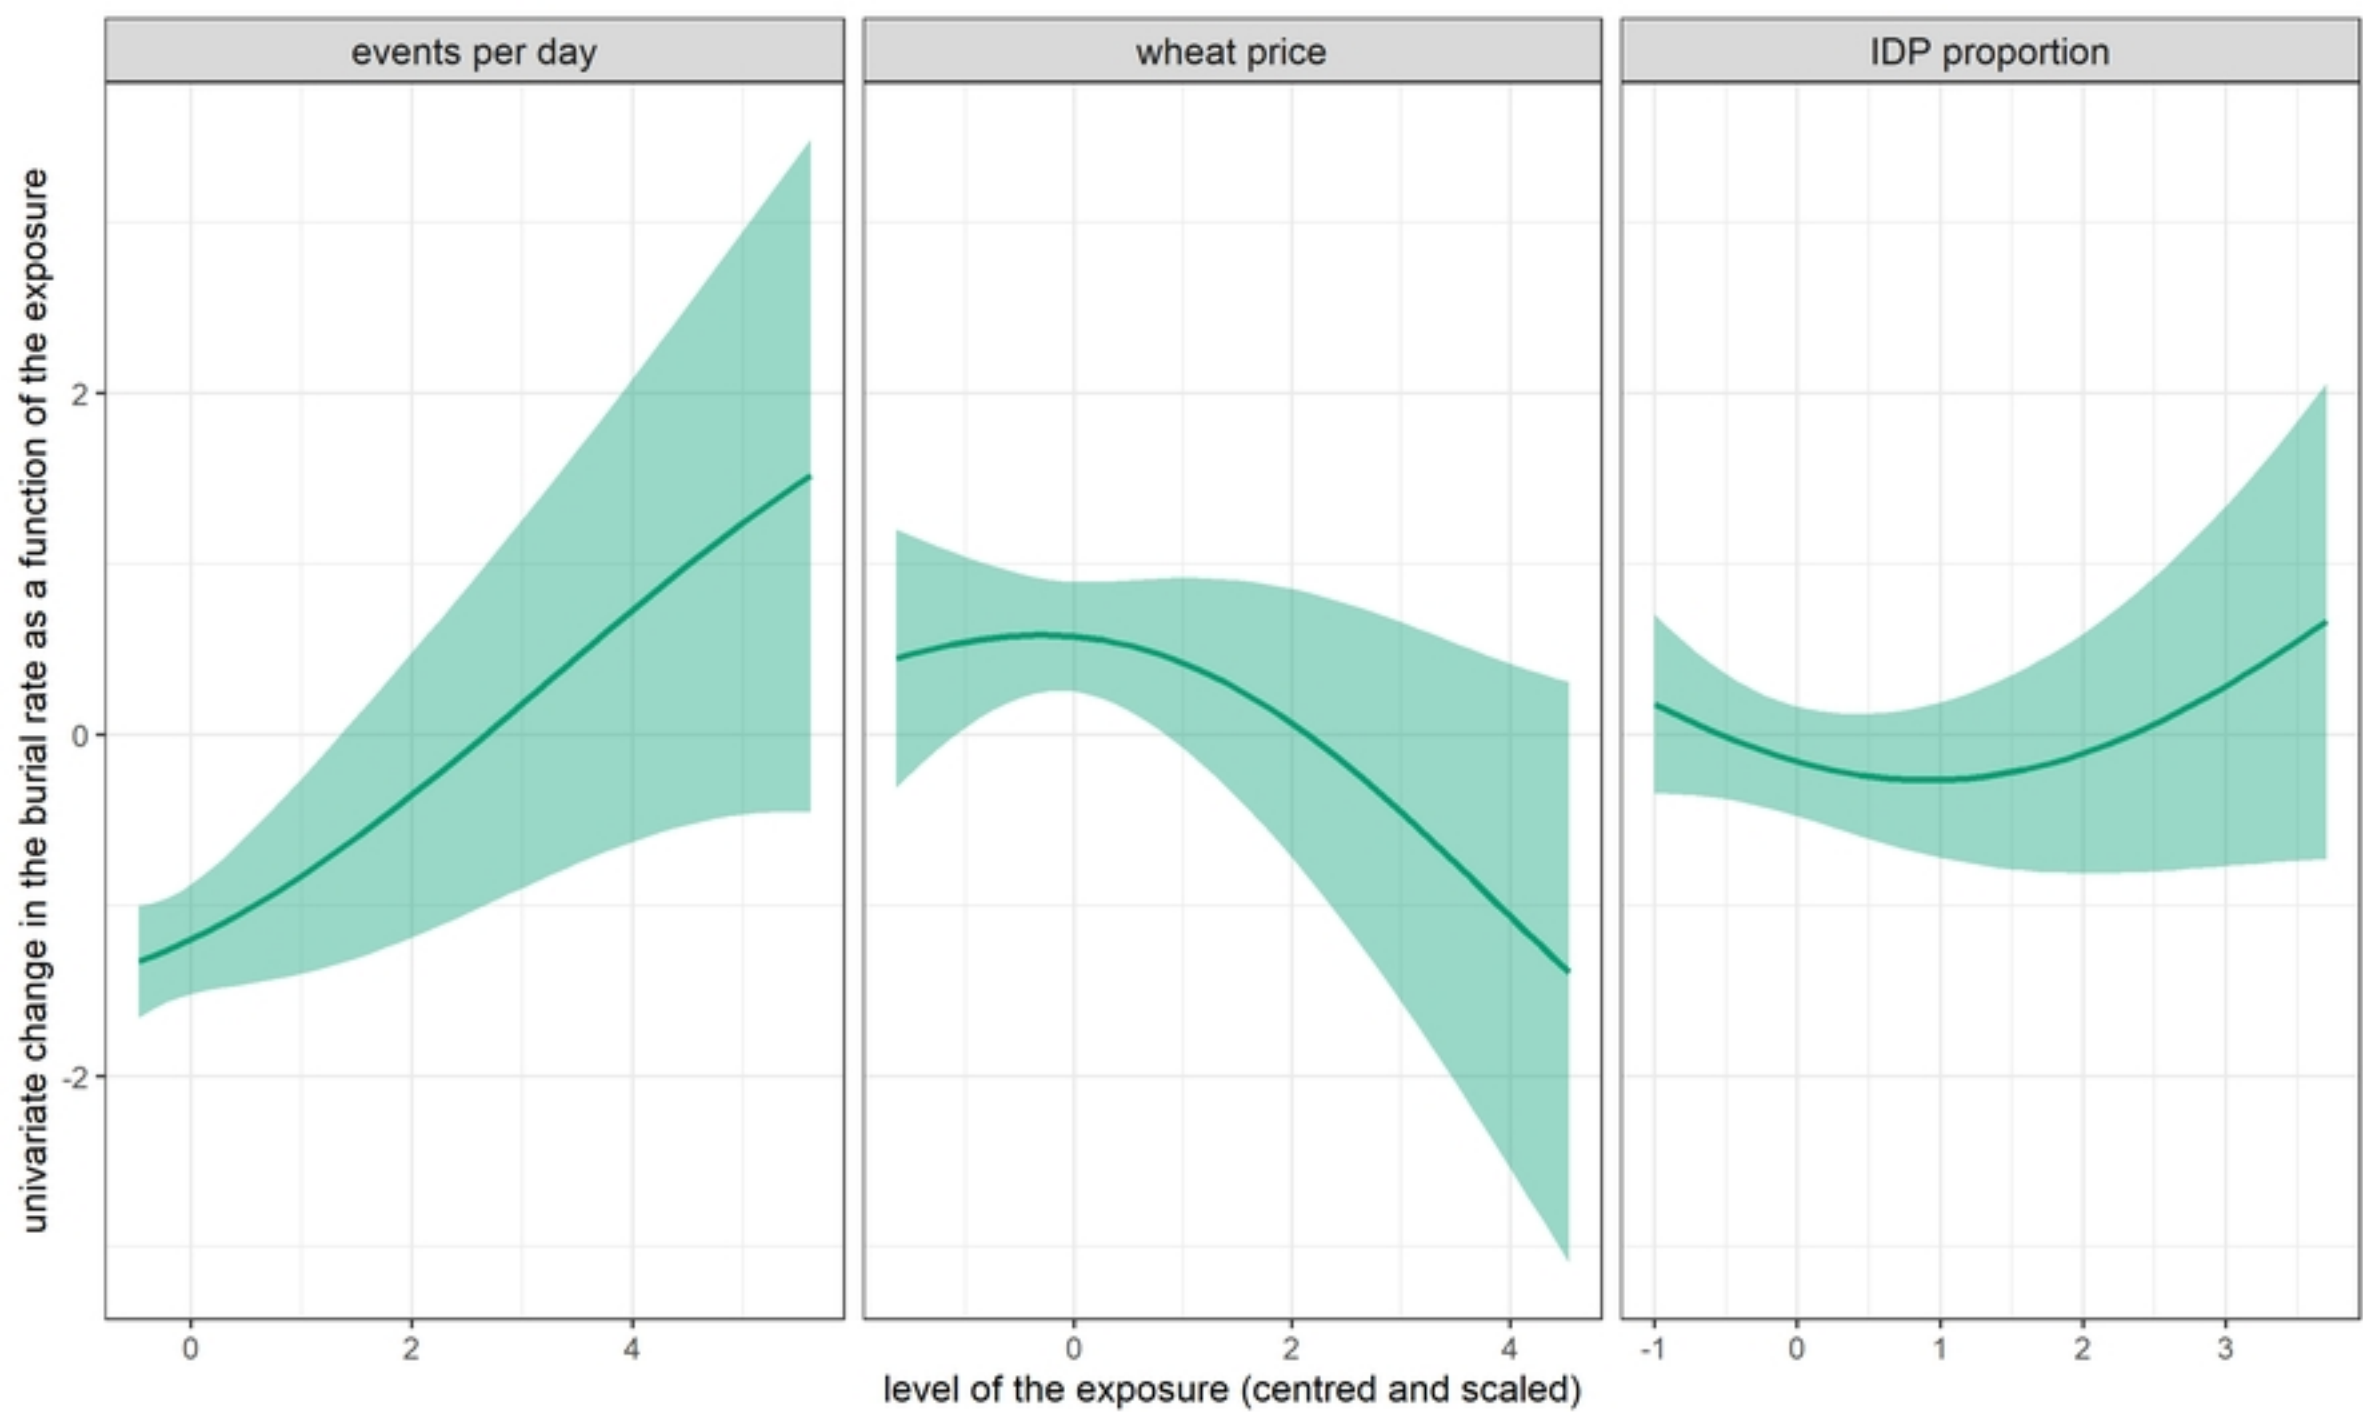

Figure 7
